1 Full article title: Neuropsychiatric Phenotypes and a Distinct Constellation of ASD Features in  
2 3q29 Deletion Syndrome: Results from the 3q29 Registry

3 Authors: Rebecca M Pollak<sup>1</sup>, Melissa M Murphy<sup>2</sup>, Michael P Epstein<sup>2</sup>, Michael E Zwick<sup>2,3</sup>,  
4 Cheryl Klaiman<sup>3,4</sup>, Celine A Saulnier<sup>3</sup>, the Emory 3q29 Project, Jennifer G Mulle<sup>2,5</sup>

5 Affiliations: <sup>1</sup>Genetics and Molecular Biology, Laney Graduate School, Emory University,

6 <sup>2</sup>Department of Human Genetics, School of Medicine, Emory University, <sup>3</sup>Department of

7 Pediatrics, School of Medicine, Emory University, <sup>4</sup>Marcus Autism Center, Children's

8 Healthcare of Atlanta and Emory University School of Medicine, <sup>5</sup>Department of Epidemiology,

9 Rollins School of Public Health, Emory University

10 Corresponding author information: Jennifer Gladys Mulle, MHS, PhD, Whitehead 305M, 615

11 Michael Street, Atlanta, GA 30322; (404) 727-3042; [jmulle@emory.edu](mailto:jmulle@emory.edu)

12 Author email addresses: Rebecca M Pollak, [rebecca.pollak@emory.edu](mailto:rebecca.pollak@emory.edu); Melissa M Murphy,

13 [melissa.murphy@emory.edu](mailto:melissa.murphy@emory.edu); Michael P Epstein, [mpepste@emory.edu](mailto:mpepste@emory.edu); Michael E Zwick,

14 [mzwick@emory.edu](mailto:mzwick@emory.edu); Cheryl Klaiman, [cheryl.klaiman@emory.edu](mailto:cheryl.klaiman@emory.edu); Celine A Saulnier,

15 [celine.saulnier@emory.edu](mailto:celine.saulnier@emory.edu); Jennifer G Mulle, [jmulle@emory.edu](mailto:jmulle@emory.edu)

16

17

18

19

20

21

22

23

24 **ABSTRACT**

25 **Background**

26 The 1.6 Mb 3q29 deletion is associated with neurodevelopmental and psychiatric phenotypes,  
27 including increased risk for autism spectrum disorder (ASD) and a 20-40-fold increased risk for  
28 schizophrenia. However, the phenotypic spectrum of the deletion, particularly with respect to  
29 ASD, remains poorly described.

30 **Methods**

31 We ascertained individuals with 3q29 deletion syndrome (3q29Del, “cases”, n=93, 58.1% male)  
32 and typically developing controls (n=64, 51.6% male) through the 3q29 registry  
33 (<https://3q29deletion.patientcrossroads.org>). Self-report of neuropsychiatric illness was evaluated  
34 for 93 cases. Subsets of participants were evaluated with the Social Responsiveness Scale (SRS,  
35 n=48 cases, 56 controls), Social Communication Questionnaire (SCQ, n=33 cases, 46 controls),  
36 Autism Spectrum Screening Questionnaire (ASSQ, n=24 cases, 35 controls), and Achenbach  
37 Behavior Checklists (n=48 cases, 57 controls).

38 **Results**

39 3q29Del cases report a higher prevalence of autism diagnoses versus the general population  
40 (29.0% vs. 1.47%,  $p < 2.2E-16$ ). Notably, 3q29 deletion confers a greater influence on risk for  
41 ASD in females (OR=41.8,  $p = 4.78E-05$ ) than in males (OR=24.6,  $p = 6.06E-09$ ); this is aligned  
42 with the reduced male:female bias from 4:1 in the general population to 2:1 in our study sample.  
43 Although 71% of cases do not report a diagnosis of ASD, there is evidence of significant social  
44 disability (3q29Del SRS *T-score*=71.8, control SRS *T-score*=45.9,  $p = 2.16E-13$ ). Cases also  
45 report increased frequency of generalized anxiety disorder compared to controls (28.0% vs.  
46 6.2%,  $p = 0.001$ ), which is mirrored by elevated mean scores on the Achenbach DSM-oriented

47 sub-scales ( $p < 0.001$ ). Finally, cases show a distinct constellation of ASD features on the SRS as  
48 compared to idiopathic ASD, with substantially elevated Restricted Interests and Repetitive  
49 Behaviors, but only mild impairment in Social Motivation.

## 50 **Conclusions**

51 Our sample of 3q29Del is significantly enriched for ASD diagnosis, especially among females,  
52 and features of autism may be present even when an ASD diagnosis is not reported. Further, the  
53 constellation of ASD features in this population is distinct from idiopathic ASD, with  
54 substantially less impaired social motivation. Our study implies that ASD evaluation should be  
55 the standard of care for individuals with 3q29Del. From a research perspective, the distinct ASD  
56 subtype present in 3q29Del is an ideal entry point for expanding understanding of ASD.

57

58

59

60

61

62

63

64

65

66

67

68

69

70

71 **Keywords**

72 Autism, copy number variants, 3q29 deletion, psychiatric genetics, SRS, developmental delay,

73 genomic disorder

74

75

76

77

78

79

80

81

82

83

84

85

86

87

88

89

90

91

92

93

94 **BACKGROUND**

95       3q29 deletion syndrome (3q29Del) is a rare (~1 in 30,000) [1, 2] genomic disorder  
96 characterized by a 1.6 Mb typically *de novo* deletion on chromosome 3 [3-5]. The interval  
97 contains 21 distinct protein-coding genes, 3 antisense transcripts, 1 long noncoding RNA, and 1  
98 microRNA. Our understanding of the syndrome phenotype continues to evolve. Initial reports  
99 found developmental delay/intellectual disability universal among 3q29 deletion carriers, though  
100 some case reports have since identified individuals without cognitive impairment [6]. The 3q29  
101 deletion is associated with a 20-40-fold increased risk for schizophrenia (SZ), with multiple  
102 replication studies supporting this association [7-11]. Case reports also indicate other  
103 neuropsychiatric phenotypes may exist, including attention deficit/hyperactivity disorder  
104 (ADHD) and bipolar disorder [3, 4, 12-16]. Previous work by our team examining self-report  
105 data from 44 individuals with 3q29Del revealed a high prevalence (~20%) of generalized anxiety  
106 disorder [5]. Further, case reports have long suggested an association with autism spectrum  
107 disorder (ASD), and studies with large sample sizes indicate that the 3q29 deletion may confer a  
108 19-fold increased risk for ASD ( $p = 0.001$ ) [17, 18].

109       The range of neuropsychiatric manifestations in 3q29Del is consistent with other  
110 genomic disorders. For example, the 22q11.2 deletion has a well-known association with  
111 schizophrenia but is also associated with intellectual disability (ID), ASD, anxiety, mood  
112 disorders, and ADHD [19, 20]. A similar constellation of phenotypes, including ASD, ADHD,  
113 ID, SZ, and anxiety, has been identified in 16p11.2 deletion and duplication syndromes [21, 22],  
114 7q11.23 duplication syndrome [23], and 1q21.1 deletion syndrome [24]. Thus, risk for multiple

115 neuropsychiatric phenotypes appears to be a feature common to many genomic disorders,  
116 including 3q29 deletion syndrome.

117         The present study aims to improve the current understanding of 3q29 deletion-associated  
118 neuropsychiatric and neurodevelopmental phenotypes, and ASD in particular, by examining data  
119 from comprehensive, standardized questionnaires in the largest cohort of individuals with  
120 3q29Del ever assembled. Developing a clearer and more comprehensive picture of 3q29  
121 deletion-associated phenotypes will aid in management of the syndrome for both families and  
122 clinicians, which may in turn improve long-term outcomes. Additionally, a careful description of  
123 the phenotypic spectrum of 3q29Del provides a basis for cross-disorder comparison between  
124 genomic disorders, which may ultimately create inroads for identifying common mechanisms  
125 underlying 3q29Del and similar CNV disorders.

## 126 **METHODS AND MATERIALS**

### 127 **Sample**

128         Individuals with 3q29Del were ascertained through the internet-based 3q29 deletion  
129 registry (<https://3q29deletion.patientcrossroads.org>) as previously reported [5]. Briefly,  
130 information about the registry was emailed to health care providers, medical geneticists, genetic  
131 counselors, and support organizations; the registry is also advertised via Google AdWords,  
132 where specific keywords were chosen to target the registry website in internet searches.  
133 Participant recruitment, informed consent and assent, and data collection are all performed  
134 through the registry website. Data were securely downloaded and de-identified for analysis.  
135 After data cleaning of the electronic records (removing spam accounts, duplicate records, and  
136 related individuals), 93 3q29Del registrants (58.1% male) were included in the present study,  
137 ranging in age from 0.1-41.0 years (mean = 10.0±8.6 years). Clinical diagnosis of 3q29 deletion

138 syndrome was confirmed in 58% of our study subjects via review of clinical genetics reports  
 139 and/or medical records. To confirm that adaptation of standardized questionnaires to an online  
 140 format did not skew results, 64 typically developing controls (51.6% male) were included,  
 141 ranging in age from 1.0-41.0 years (mean = 9.9±7.2 years). Controls were recruited via emails  
 142 sent to intramural CDC and Emory listservs and invited to fill out surveys in an identical fashion  
 143 to cases. Controls reporting a clinical diagnosis of any neurodevelopmental disorder were  
 144 excluded (n = 1). Description of the study sample can be found in Table 1. This study was  
 145 approved by Emory University’s Institutional Review Board (IRB00064133).

146 **Table 1: Characteristics of study participants with 3q29Del and controls.**

|                        | 3q29 Deletion Syndrome | Control    | P value  |
|------------------------|------------------------|------------|----------|
| Age, years (mean ± SD) | 10.0 ± 8.6             | 9.9 ± 7.2  | 0.945    |
| Sex (n, %)             |                        |            | 0.521    |
| Male                   | 54 (58.1%)             | 33 (51.6%) |          |
| Female                 | 39 (41.9%)             | 31 (48.4%) |          |
| Race (n, %)            |                        |            | 0.0003   |
| White                  | 81 (87.1%)             | 41 (64.1%) |          |
| Black/African American | 2 (2.2%)               | 12 (18.8%) |          |
| Other                  | 10 (10.8%)             | 9 (14.1%)  |          |
| Blank                  | 0 (0%)                 | 2 (3.1%)   |          |
| Heart Defect (n, %)    |                        |            | 2.37E-07 |
| Yes                    | 27 (29.0%)             | 2 (3.1%)   |          |
| No                     | 54 (58.1%)             | 61 (95.3%) |          |
| Blank                  | 12 (12.9%)             | 1 (1.6%)   |          |
| Age at Walking (n, %)  |                        |            | 2.16E-09 |
| Normal                 | 42 (45.7%)             | 60 (93.8%) |          |
| Delayed                | 23 (25.0%)             | 1 (1.6%)   |          |
| Extremely Delayed      | 12 (13.0%)             | 1 (1.6%)   |          |
| Unsure                 | 10 (10.9%)             | 2 (3.1%)   |          |
| Not applicable         | 5 (5.4%)               | 0 (0%)     |          |

147 Demographic data collected from the custom Medical & Demographic Questionnaire completed  
 148 by participants upon enrollment in the online 3q29 Registry. P values were calculated with

149 Student's t-test (age), Fisher's exact test (race, heart defect, age at walking), or Pearson's chi  
150 square test (sex).

## 151 **Questionnaires**

152 Upon registration, the participant or his/her parent completed a custom medical and  
153 demographic questionnaire. This questionnaire includes questions on the sex, birthdate, race, and  
154 ethnicity of the participant, as well as a detailed medical history, including developmental  
155 milestones and prior clinical diagnoses of any neuropsychiatric or neurodevelopmental disorders  
156 [5].

157 Four standardized questionnaires were used to assess ASD-related symptomology and  
158 general behavioral problems in the participants. The Social Responsiveness Scale (SRS;  
159 preschool, school-age, and adult forms; n = 48 3q29Del, 56 controls) is a 65-item, 4 point Likert-  
160 scaled questionnaire designed to assess ASD-related symptoms along a normative continuum  
161 [25]. The Social Communication Questionnaire (SCQ, n = 33 3q29Del, 46 controls) is a 40-item,  
162 yes/no questionnaire designed to assess ASD-related symptoms keyed to DSM criteria [26]. The  
163 Autism Spectrum Screening Questionnaire (ASSQ, n = 24 3q29Del, 35 controls) is a 27-item,  
164 yes/somewhat/no questionnaire designed to assess ASD-related symptoms in high-functioning  
165 individuals with no to mild ID [27]. The Child Behavior Checklist (CBCL) and Adult Behavior  
166 Checklist (ABCL) are 100-, 113-, or 126-item (CBCL preschool, CBCL school-age, and ABCL,  
167 respectively; n = 48 3q29Del, 57 controls), 3 point Likert-scaled questionnaires designed to  
168 assess behavioral or developmental problems [28, 29]. Data from the CBCL and ABCL were  
169 pooled for analysis. All standardized questionnaires were adapted for the online 3q29 deletion  
170 registry and were completed by the participant or parent/guardian of the participant upon  
171 registration. Some participants were not eligible to complete the standardized questionnaires



172 because the proband was too young. Demographic characteristics of the respondents for each  
173 questionnaire can be found in Table S1, demonstrating that the average age and sex distribution  
174 of participants who completed the medical and demographic questionnaire was not different  
175 from the average age and sex distribution of participants who completed each standardized form.

## 176 **Analysis**

177 Data from standardized questionnaires were imported into R [30] and were recoded and  
178 scored according to the publisher's guidelines. Features of interest from the medical history  
179 questionnaire (heart defects, age at walking, ASD diagnosis, global developmental delay/mental  
180 retardation (GDD/MR) diagnosis) were recoded for analysis as follows: heart defects, yes/no;  
181 age at walking, binned as normal ( $\leq 18$  months), delayed (19-24 months), and extremely delayed  
182 ( $> 24$  months); ASD diagnosis, yes/no; GDD/MR diagnosis yes (reported diagnosis of global  
183 developmental delay and/or mental retardation)/no. To compare responses between 3q29Del  
184 cases and controls, linear models and logistic regression models were implemented using the  
185 stats R package [30]. To perform case-only analysis within 3q29Del cases, linear models and  
186 logistic regression models were implemented using the stats R package [30] and cumulative link  
187 proportional-odds models were implemented using the ordinal R package [31]. All statistical  
188 models included age, race, and sex as covariates. To compare rates of self-reported diagnoses  
189 and demographic parameters between 3q29Del cases and controls, Fisher's exact test was  
190 implemented using the stats R package [30]. To compare rates of self-reported diagnoses in  
191 3q29Del cases to population prevalence values, one-sample proportion tests with Yates'  
192 continuity correction were implemented using the stats R package [30]. To compare sex  
193 distribution between 3q29Del participants and controls, Pearson's chi square test was  
194 implemented using the stats R package [30]. To compare age distribution in 3q29Del participants

195 and controls, two sample t-test was implemented using the stats R package [30]. To compare  
196 scores in 3q29Del participants to mean values for children with idiopathic ASD, one sample t-  
197 test was implemented using the stats R package [30]. Odds ratios and p values were calculated  
198 using the fmsb R package [32]. Figures were generated using the plotly and ggplot2 R packages  
199 [33][34].

### 200 *Sensitivity Analysis*

201 The questionnaires for 90 participants with 3q29Del (96.8%) were completed by a parent  
202 or guardian (“parent-registered”), while 3 participants with 3q29Del (3.2%) completed all  
203 questionnaires themselves (“self-registered”). All control participants were parent-registered. To  
204 assess whether responses from the self-registered 3q29Del participants were influencing the  
205 results, self-registrants were removed and the data were re-analyzed. Self-registrants were not  
206 found to have a significant effect on the analyses (Tables S2 and S3). All results include both  
207 parent- and self-registrants.

## 208 **RESULTS**

### 209 **Self-report of neuropsychiatric diagnosis in 3q29Del**

210 Self-report of neuropsychiatric diagnoses in our 3q29Del study subjects (Table 2)  
211 revealed a higher prevalence of neuropsychiatric disorder diagnoses compared to controls,  
212 including anxiety (28.0%), and compared to general population frequencies, including ASD  
213 (29.0%, Figure 2A) and GDD/MR (59.1%) (Table 2), confirming prior work by our group [5].  
214 Reported rates of conduct disorder (1.1% vs. 3.5%) and oppositional defiant disorder (3.2% vs.  
215 3.5%) were similar to those observed in the general population. While a small proportion of  
216 participants reported diagnoses of bipolar/manic depression (4.3%), depression (6.5%), and  
217 schizophrenia (4.3%), we focused on ASD due to the young age (mean = 10.0 years) of our study

218 population, since many study participants have not reached the age of risk for schizophrenia and  
219 other adult-onset disorders. Despite this young age, the self-reported rate of SZ diagnoses in our  
220 adult study subjects (age > 18 years, n = 13) was 15-30 times higher than expected (15.4%  
221 compared to an expected 0.5-1% in the general population; n = 2) [35-39] and the frequency of  
222 bipolar disorder was ~1.8 times higher than expected [40]. A summary of neuropsychiatric  
223 diagnoses can be found in Table 2.

224 [Table 2 here]

### 225 **SRS, SCQ, ASSQ, and CBCL/ABCL scores**

226 In 3q29 deletion study subjects, the mean SRS score was in the moderate range (*T-score*  
227 = 71.8), the mean ASSQ score was in the clinical range (mean = 22.2), and the mean  
228 CBCL/ABCL score was in the borderline range (*T-score* = 62.5). The mean SCQ score in 3q29  
229 deletion carriers was at the extremely high end of the normal range (mean = 13.9, clinical cutoff  
230 = 15) and elevated as compared to controls (mean = 3.5). Mean scores for typically developing  
231 controls were all in the normal range (SRS *T-score* = 45.9, ASSQ mean = 2.2, CBCL/ABCL *T-*  
232 *score* = 41.8, SCQ mean = 3.5) (Figure 1). Participants with 3q29Del scored significantly higher  
233 than typically developing controls on all four scales ( $p < 3.0E-12$ , Table S4).

### 234 **Standardized scores stratified by ASD diagnosis**

235 Next, we examined the relationship between SRS scores and reported ASD diagnosis, to  
236 determine whether the score inflation we observed in our study population as a whole was  
237 largely due to the increased prevalence of ASD. As expected, we observed that individuals with  
238 3q29Del and an ASD diagnosis scored significantly higher than both controls and individuals  
239 with 3q29Del without an ASD diagnosis (3q29Del with ASD n = 17, *T-score* = 82.41; 3q29Del  
240 without ASD n = 31, *T-score* = 65.90; control n = 56, *T-score* = 45.90;  $p < 3.0E-13$ ; Figure 2B).

241 We were interested to observe that individuals with 3q29Del without an ASD diagnosis also  
242 scored significantly higher than controls (3q29Del without ASD n = 31, *T-score* = 65.90; control  
243 n = 56, *T-score* = 45.90;  $p = 2.16E-13$ ; Figure 2B), indicating that increased SRS scores in  
244 individuals with 3q29Del are not driven by ASD diagnostic status alone (Table S5). Similar  
245 features were observed in the contribution of ASD diagnosis status to SCQ scores (Figure S1,  
246 Table S6).

### 247 **Standardized scores stratified by sex**

248 Both males and females with 3q29Del reported a significantly increased frequency of  
249 ASD diagnoses, with a substantially greater burden for ASD on females with 3q29Del. Males  
250 with 3q29Del are at 16-fold increased risk for ASD as compared to the general population  
251 (37.0% vs. 2.34%, OR = 24.6,  $p = 6.06E-09$ ) and females are at 34-fold risk compared to the  
252 general population (17.9% vs. 0.52%, OR = 41.8,  $p = 4.78E-05$ ) (figure 2A) [41], resulting in a  
253 male:female ratio in our study population of 2:1, as compared to the general population ratio of  
254 4:1. Taken together, this indicates that the 3q29 deletion elevates the risk for ASD in females  
255 more substantially than in males.

256 Based on the sex differences in ASD risk for individuals with 3q29Del, we also examined  
257 possible sex differences in scores. We found that both males and females with 3q29Del scored  
258 significantly higher than controls (3q29Del male n = 26, *T-score* = 74.31; control male n = 30, *T-*  
259 *score* = 45.80;  $p = 7.70E-11$ ; 3q29Del female n = 22, *T-score* = 68.73; control female n = 26, *T-*  
260 *score* = 46.04;  $p = 7.42E-09$ ); while 3q29Del males have higher scores than females, the  
261 differences are not statistically significant (3q29Del male n = 26, *T-score* = 74.31; 3q29Del  
262 female n = 22, *T-score* = 68.73;  $p > 0.05$ ; Figure 2C). After stratifying our study population  
263 further by sex and ASD diagnosis status, we determined that both male and female 3q29Del

264 participants without an ASD diagnosis had significantly higher scores than controls (3q29Del  
265 male without ASD  $n = 14$ ,  $T\text{-score} = 66.29$ ; control male  $n = 30$ ,  $T\text{-score} = 45.80$ ;  $p = 1.20E-06$ ;  
266 3q29Del female without ASD  $n = 17$ ,  $T\text{-score} = 65.69$ ; control female  $n = 26$ ,  $T\text{-score} = 46.04$ ;  $p$   
267  $= 5.04E-07$ ; Figure 2D). Taken together, this suggests that increased SRS scores in individuals  
268 with 3q29Del are not driven by sex alone or by sex and ASD diagnosis status in combination  
269 (Table S5); rather, the presence of the deletion itself confers a greater risk for social disability.  
270 Furthermore, these data show an enrichment for female ASD in our study population, based on  
271 the reduction in male bias and the highly similar scores between males and females with  
272 3q29Del, irrespective of ASD diagnosis status. Similar features were observed in the  
273 contribution of sex to SCQ scores (Figure S1, Table S6).

#### 274 **ASD presentation of 3q29Del**

275 While total scores on the SRS, SCQ, ASSQ, and CBCL/ABCL can give an indication of  
276 the overall level of impairment of individuals, sub-scores can reveal nuanced deficits in specific  
277 behavioral domains. To this end, we analyzed all SRS sub-scales (Social Awareness, Social  
278 Cognition, Social Communication, Social Motivation, Restricted Interests and Repetitive  
279 Behaviors, and Social Communication and Interaction) to better understand the extent of social  
280 disability in our study population; our goal was to determine whether our observed total score  
281 inflation was due to a specific severe deficit in a few domains, or if individuals with 3q29Del  
282 showed high scores across all sub-scales. The mean score for the Restricted Interests and  
283 Repetitive Behaviors sub-scale was in the severe range ( $T\text{-score} = 77.3$ ). Mean scores for Social  
284 Awareness ( $T\text{-score} = 67.3$ ), Social Cognition ( $T\text{-score} = 69.1$ ), Social Communication ( $T\text{-score}$   
285  $= 69.7$ ), and Social Communication and Interaction ( $T\text{-score} = 69.5$ ) were all in the moderate  
286 range. Notably, the mean score for Social Motivation was in the mild range ( $T\text{-score} = 62.1$ ,

287 Figure 3A, Table 3). This sub-score profile is strikingly different from that reported in studies of  
288 idiopathic ASD, where children tend to score equally high on all sub-scales (3q29Del Social  
289 Motivation *T-score* = 62.1, idiopathic ASD Social Motivation *T-score* = 78.4,  $p = 7.66E-11$ )  
290 [42]. This atypical behavioral profile is supported by clinical data; direct assessment of  
291 individuals with 3q29Del by clinicians affiliated with the Emory 3q29 Project  
292 (<http://genome.emory.edu/3q29/>, [43]) show less impaired social motivation as compared to  
293 children with idiopathic ASD.

#### 294 *ASD presentation stratified by sex*

295 To determine whether this unusual SRS sub-score profile was influenced by sex, we  
296 examined profiles of male and female 3q29 deletion carriers separately. We found that the shape  
297 of the profiles were identical, with males scoring on average 5 points higher than females on  
298 every sub-scale ( $n = 26$  male, 22 female;  $p > 0.05$ ; Figure 3B; Table 3), demonstrating that the  
299 social disability in 3q29Del is not qualitatively different between males and females.

#### 300 *ASD presentation stratified by ASD diagnosis*

301 We then stratified our study subjects according to reported ASD diagnosis status and  
302 examined subscale scores separately for 3q29Del individuals reporting a diagnosis of ASD and  
303 those not reporting a diagnosis of ASD. We observed that the shape of the profile is shared  
304 between 3q29Del individuals reporting a diagnosis of ASD and those not reporting a diagnosis of  
305 ASD, with individuals reporting a diagnosis of ASD scoring on average 10-15 points higher on  
306 every sub-scale (Figure 3C). As expected, 3q29Del participants with ASD scored significantly  
307 higher on all sub-scales than 3q29Del participants without ASD ( $n = 17$  with ASD, 31 without  
308 ASD;  $p < 0.005$ ; Table 3); however, 3q29Del participants without ASD still scored significantly  
309 higher than controls on all sub-scales ( $n = 31$  without ASD, 56 control;  $p < 5.0E-05$ ; Table 3).

310 [Table 3 here]

### 311 **Additional neuropsychiatric phenotypes in 3q29Del**

312 To further assess behavioral features associated with the 3q29 deletion, we examined the  
313 DSM-oriented Attention Deficit/Hyperactivity Problems, Anxiety Problems, and Depressive  
314 Problems sub-scales from the CBCL and ABCL. These DSM-oriented sub-scales align with  
315 neuropsychiatric diagnoses reported by individuals with 3q29Del [5]. Individuals with 3q29Del  
316 scored significantly higher than typically developing controls on all three scales (3q29Del  
317 Attention Deficit/Hyperactivity Problems *T-score* = 61.0, control Attention Deficit/Hyperactivity  
318 Problems *T-score* = 51.3, 3q29Del Anxiety Problems *T-score* = 60.9, control Anxiety Problems  
319 *T-score* = 52.9, 3q29Del Depressive Problems *T-score* = 62.7, control Depressive Problems *T-*  
320 *score* = 52.3, all  $p < 0.001$ , Figure 3D, Table S7), supporting previous reports of increased risk  
321 for neuropsychiatric phenotypes associated with the 3q29 deletion [5].

### 322 **Confounding due to heart defects and/or ID-related phenotypes**

323 A previous study of 3q29Del by our group showed that approximately 25% of individuals  
324 with 3q29Del reported a congenital heart defect [5]. Early hypoxic insult due to a heart defect  
325 has been hypothesized to contribute to later neuropsychiatric and neurodevelopmental outcomes  
326 [44-49]. To determine if the high frequency of heart defects in our study population was driving  
327 adverse neurodevelopmental outcomes within 3q29Del cases, we implemented generalized linear  
328 and cumulative link models to assess the relationship between congenital heart defects and  
329 clinical ASD diagnosis, GDD/MR diagnosis, and age at walking, which has been reported to be a  
330 suitable proxy for ID in the absence of available IQ and adaptive behavior measures [50].  
331 Congenital heart defects were not associated with self-reported ASD or GDD/MR diagnoses or  
332 age at walking ( $p > 0.05$ , Table S8). Individuals with 3q29Del are also commonly diagnosed

333 with mild to moderate ID [5]. To ask whether ASD phenotypes or ASD features were  
334 disproportionately overrepresented in individuals with more pronounced ID-related phenotypes  
335 and/or heart defects, we stratified the data according to these phenotypes. Within our 3q29Del  
336 study population, congenital heart defects were associated with significantly increased scores on  
337 the SCQ and CBCL/ABCL ( $p < 0.05$ ); however, reported GDD/MR diagnosis and age at  
338 walking were not significantly associated with scores on the SRS, SCQ, ASSQ, or CBCL/ABCL  
339 ( $p > 0.05$ , Table S9). These data indicate that ID-related phenotypes were not driving the  
340 increased scores in our study population.

## 341 **DISCUSSION**

342 Previous studies have found enrichment of the 3q29 deletion in large samples ascertained  
343 based on clinical ASD diagnosis [17, 18]. We have approached the association of 3q29Del with  
344 ASD from a different angle; by ascertaining subjects with 3q29Del and investigating the  
345 prevalence of reported ASD diagnosis and ASD-related phenotypes, the current study  
346 complements the existing literature, providing additional evidence for the 3q29 deletion as a  
347 genetic risk factor for ASD. Notably, the male:female ratio of self-reported ASD diagnosis in our  
348 study population is 2:1. This is a reduction from the 4:1 male bias observed in idiopathic ASD in  
349 the general population. A substantial reduction in male bias in ASD prevalence has been  
350 observed in studies of other CNVs and single-gene mutations; a recent study has shown that as  
351 the severity of a mutation increases, the sex ratio in ASD prevalence approaches 1:1 [51]. Taken  
352 together, this suggests that the 3q29 deletion is approaching the severe end of the spectrum of  
353 ASD-associated mutations.

354 We have shown that compared to typically developing children, our 3q29Del sample is  
355 significantly enriched for ASD features and other behavioral problems, irrespective of a clinical



356 ASD diagnosis. This finding is particularly concerning; while individuals with 3q29Del who  
357 have an ASD diagnosis tend to score higher on symptomology scales overall, 3q29Del  
358 individuals without an ASD diagnosis still score significantly higher than typically developing  
359 children. This indicates several possible explanations: a) an enrichment for ASD features or  
360 social disability that falls short of diagnostic criteria, b) possible undiagnosed ASD in our study  
361 population, or c) non-specificity of the SRS, and potentially SCQ, for phenotypes other than  
362 ASD, such as anxiety. The possibility of undiagnosed ASD in our study population is aligned  
363 with anecdotal reports from parents of our study participants, where they have reported concerns  
364 about atypical social development that do not appear to have been addressed using gold-standard  
365 ASD evaluations. Based on the elevated symptomology scores in our study population, the  
366 substantially increased risk for ASD associated with the 3q29 deletion, and the apparent severity  
367 of the 3q29 deletion, our data suggest that gold-standard ASD evaluations should be the  
368 recommended standard of care for individuals diagnosed with 3q29Del. If implemented, this  
369 practice would enable patients to gain access to early interventions, treatments, and therapeutic  
370 programs that are known to improve later outcomes.

371         Based on the SRS sub-scales, participants with 3q29Del display a strikingly different  
372 behavioral profile as compared to a study of children with idiopathic ASD [42]. Male and female  
373 3q29Del individuals show substantially less impaired social motivation in the context of an  
374 otherwise typical ASD profile, with the most severe deficits in the Restricted Interests and  
375 Repetitive Behaviors domain. This profile is also observed when dividing scores for 3q29Del  
376 participants based on reported ASD diagnosis. This qualitative difference from idiopathic ASD  
377 may serve as an inroad to therapeutic interventions in 3q29Del, as well as an investigative inroad  
378 to a distinct subtype of ASD. Because social motivation appears to be relatively well-preserved

379 in 3q29Del, this suggests that therapies such as cognitive-behavioral therapy to teach social skills  
380 and effective strategies for social interaction may be particularly successful in this patient  
381 population.

382         Some facets of the difference in ASD features between 3q29Del and idiopathic ASD are  
383 recapitulated by the scores on the Withdrawn sub-scale of the CBCL and ABCL. Previous  
384 studies utilizing the CBCL in idiopathic ASD have found that mean scores for participants with  
385 ASD are in the borderline range, with over 50% of subjects scoring in the borderline or clinical  
386 range [52, 53]. While 3q29Del participants generally, as well as males and females separately,  
387 score significantly higher than controls, their mean score is still in the normal range (Figure S2A  
388 and B). However, 60% of 3q29Del participants reporting an ASD diagnosis score in the  
389 borderline or clinical range (Figure S2C, Table S10), which is in line with what is expected  
390 based on studies of idiopathic ASD [52, 53]. This is in conflict with the relatively well-preserved  
391 social motivation in 3q29Del individuals with ASD identified in our analysis of the SRS sub-  
392 scales and suggests that a more refined analysis is merited to identify the true degree of social  
393 disability in this population.

394         We tested the hypothesis that the score inflation observed in our 3q29Del study subjects  
395 may be due to the high prevalence of developmental delay or congenital heart defects [5]. Our  
396 available data do not support this hypothesis, and instead reveal that social disability is equally  
397 distributed in our study population. Lack of direct measures of intellectual disability, and errors  
398 or missing data in self-report measures, may obscure this relationship; however, numerous  
399 studies of the relationship between ID and ASD in genomic disorders suggests that when the  
400 population is stratified by the presence of a specific genetic variant, the association between  
401 these two phenotypes diminishes. A large study of several genetic disorders showed that the

402 prediction of genetic diagnosis based on ADI-R scores was not confounded by IQ [54]; a study  
403 of 7q11.23 duplication found that IQ was not significantly associated with ASD status [55]; and  
404 multiple studies of 22q11.2 deletion have shown that IQ is not significantly associated with SRS  
405 score, ASD severity, and ASD status [56-58]. A question ripe for future investigation is the  
406 potential role for microcephaly in the ASD-related phenotypes observed in 3q29Del.  
407 Microcephaly, ASD, and ID are associated with the 16p11.2 duplication [21]; microcephaly has  
408 been shown to be associated with ASD and ID in probands with pathogenic CNVs [59]; and  
409 children with “complex autism”, defined as ASD with microcephaly and/or dysmorphology,  
410 have significantly lower cognitive function than children with “essential autism” [60]. Reports  
411 have shown a high prevalence of microcephaly in 3q29Del [3, 4, 12]; however, this question was  
412 not probed in the current study due to the high rate (>50%) of 3q29Del participants responding  
413 “Unsure” to the medical history questionnaire regarding their child’s head circumference at birth,  
414 rendering this data unreliable. Ongoing studies with direct evaluation of study subjects [43] will  
415 address these questions.

416         While this study is the most comprehensive study of behavioral phenotypes in 3q29Del to  
417 date, it is not without limitations. All of the data used in the present study were collected from  
418 questionnaires completed by the parents and guardians of individuals with 3q29Del, which  
419 introduces several potential sources of bias. Some studies have questioned the validity and  
420 reliability of parent-report data [61]; however, a recent study in Williams syndrome patients has  
421 shown that parents are more accurate in predicting their child’s social behaviors than the child  
422 themselves [62]. The responses to the medical and demographic questionnaire are more likely to  
423 include error due to the fact that the data is retrospective. By limiting our study to only a few key  
424 points in the medical history (heart defects, age at walking, and ID/ASD diagnosis) we aimed to

425 reduce recall errors; however, we only had proxies for ID, rather than direct evaluation of  
426 cognitive ability. Further, the sample sizes for our stratified analyses were small, rendering them  
427 underpowered; while the differences between males and females were not statistically  
428 significant, males do score higher than females on all measures. Studies with larger sample size  
429 will be better able to assess the importance of and estimate the true effect size of any difference  
430 between males and females. Additionally, there is likely ascertainment bias within our sample.  
431 First, our sample of 93 individuals with 3q29Del is 87.1% white, indicating that we are not  
432 adequately reaching minority populations. Second, parents that register their children and  
433 complete in-depth questionnaires are likely to be highly motivated, possibly because their  
434 children experience significant morbidity – a potential indication that we are sampling from the  
435 extreme of the phenotypic distribution of 3q29Del. Thus, scores on the standardized  
436 questionnaires, as well as rates of heart defects and clinical neuropsychiatric diagnoses, may be  
437 higher in our study sample than in the general 3q29Del population. Additionally, the odds ratios  
438 calculated for the increased risk for ASD associated with the 3q29 deletion may also be  
439 overestimated, due to the combined effects of self-report data and ascertainment bias; however,  
440 if this increased risk is replicated using gold-standard diagnostic measures, it could provide  
441 valuable insight into possible sex-specific effects of the deletion. Finally, the lack of observed  
442 association between congenital heart defects and neurodevelopmental outcomes may be obscured  
443 by the high rate of patent ductus arteriosus in 3q29 deletion syndrome [5], which is a relatively  
444 mild heart defect; however, the low number of participants with different types of heart defects  
445 rendered analyses to assess their associations with neurodevelopment underpowered (Table S11).  
446 Ongoing studies by the Emory 3q29 Project (<http://genome.emory.edu/3q29/>), including direct

447 in-person patient evaluations [43] aim to address some of the weaknesses of the present work by  
448 performing comprehensive gold-standard evaluations by expert clinicians.

449         While direct in-person evaluations are the ideal method to corroborate the findings of this  
450 study, the low population frequency of the 3q29 deletion and geographic dispersal of our study  
451 population (Figure S3) renders this approach infeasible for a large number of study subjects.  
452 However, a small number of 3q29 deletion study subjects have been directly assessed as part of  
453 the Emory 3q29 Project (<http://genome.emory.edu/3q29/>). We confirm high concordance  
454 between registry-leveraged data and gold-standard direct evaluation, as all participants  
455 qualifying for an ASD diagnosis based on gold-standard evaluation have clinically significant  
456 scores on the SRS and all participants reporting an ASD diagnosis qualified for an ASD  
457 diagnosis after gold-standard assessment by the Emory 3q29 Project team (Table S12). Notably,  
458 one participant that did not report a prior diagnosis of ASD received an ASD diagnosis after  
459 assessment by our team, supporting our hypothesis that ASD may be underdiagnosed in the  
460 3q29Del population. Five additional participants with a clinically significant SRS score did not  
461 qualify for an ASD diagnosis, suggesting that the SRS is not selectively identifying children with  
462 ASD in participants with 3q29Del, possibly due to the high rates of reported anxiety in our study  
463 population. However, this comparison does suggest that our analysis, though based on self-report  
464 data, reveals valid conclusions about behavioral phenotypes in 3q29 deletion syndrome. For  
465 genetic syndromes with low population frequencies, data collection through remote means such  
466 as online patient registries remains a valuable phenotyping tool.

467         While the current understanding of the 3q29 deletion is still evolving, there are more  
468 well-understood CNV disorders that can be used as a comparison point to determine whether the  
469 social disability phenotypes described in this study are distinct to 3q29Del. These include

470 Williams Syndrome (WS, or the 7q11.23 deletion), the reciprocal 7q11.23 duplication, 16p11.2  
471 deletion and duplication, Smith-Magenis Syndrome (SMS), and 22q11.2 deletion. WS is  
472 typically associated with hyper-sociability [63], and patients with WS show more problems with  
473 social cognition than with pro-social behaviors [64], similar to what we have observed in our  
474 population of individuals with 3q29Del. However, the prevalence of restricted interests and  
475 repetitive behaviors appears to be lower in WS as compared to 3q29Del [64], and the mean SRS  
476 sub-scale Social Motivation score indicates enhanced social motivation in WS as compared to  
477 3q29Del (WS mean *T-score* = 55.24, 3q29Del mean *T-score* = 62.1,  $p = 0.0005$ ) [65]. Studies of  
478 the reciprocal 7q11.23 duplication showed that parent-reported ASD symptomology via  
479 standardized questionnaires was higher than ASD features as assessed by gold-standard  
480 instruments; that some probands had been diagnosed with ASD based on delayed speech and  
481 social anxiety but did not qualify for ASD via gold-standard measures; that substantially more  
482 males than females qualified for an ASD diagnosis; and that 7q11.23 duplication probands were  
483 indistinguishable from children with idiopathic ASD on measures of ASD severity and diagnosis  
484 status [55, 66, 67]. This is qualitatively different from our 3q29Del population; all of the  
485 participants with a prior ASD diagnosis who were later assessed by the Emory 3q29 Project team  
486 had their diagnosis confirmed using gold-standard measures (Table S12), the male:female ratio  
487 in our sample is 2:1, and we see significant differences between 3q29Del cases and idiopathic  
488 ASD [42] on the SRS Social Motivation sub-scale.

489         Similar to 7q11.23 duplication, ASD probands with 16p11.2 deletion or duplication were  
490 indistinguishable from idiopathic ASD probands [67]; probands with 16p11.2 deletion also have  
491 a significantly higher mean SRS score as compared to 3q29Del (16p11.2 mean *T-score* = 77.8,  
492 3q29Del mean *T-score* = 71.8,  $p = 0.003$ ) [22], and males with 16p11.2 deletion are at increased

493 risk for ASD compared to females and are overrepresented when cases are ascertained based on  
494 neurodevelopmental disorders [68, 69], indicating a different sex-based ASD risk as compared to  
495 3q29Del. A study of 16p11.2 duplication probands found that scores on the SRS Social  
496 Motivation sub-scale were not significantly different from controls and that ASD cases had  
497 specific impairments in social cognition and communication [70]; 3q29Del cases score  
498 significantly higher than controls on the SRS Social Motivation sub-scale, and do not have  
499 substantially higher scores on the Social Cognition or Social Communication sub-scales relative  
500 to the other SRS sub-scales.

501         A recent study of SMS showed that female probands scored higher than males on SRS  
502 sub-scales and the sex ratio of ASD was reversed, with more females than males qualifying for a  
503 diagnosis [71], which we do not observe in our 3q29Del study population. Finally, studies of  
504 22q11.2 deletion show some similarities with 3q29Del, including SRS total scores that are not  
505 significantly different, high levels of ASD features in the absence of ASD diagnosis, and a  
506 male:female ASD ratio of approximately 1:1 [19, 57, 58, 72]; however, 22q11.2 deletion  
507 probands have a significantly lower mean ASSQ score as compared to 3q29Del (22q11.2 mean =  
508 11, 3q29Del mean = 22.2,  $p = 0.00004$ ), and 3q29Del cases have significantly higher scores on  
509 several CBCL/ABCL sub-scales (Table S13) [73, 74]. Taken together, this evidence suggests  
510 that while the ASD features in 3q29Del reported in this study share some characteristics with  
511 other CNV disorders, the complete constellation of symptoms is discrete from previously  
512 described genomic syndromes.

513         There are significant strengths of this study as compared to previous studies of 3q29Del.  
514 First, this is the largest cohort of individuals with 3q29Del ever assembled. This is a critical step  
515 in capturing the true phenotypic spectrum associated with the 3q29 deletion. Our use of

516 standardized questionnaires allowed for comparison between ASD features present in 3q29Del  
517 and those reported in idiopathic ASD and ASD in other CNV disorders. Additionally, our online  
518 patient registry allows for remote data collection, which has enabled us to expand our sample  
519 size. This study has shown that high-quality, comprehensive medical history and symptomology  
520 data can be collected through an online patient registry, effectively reducing the patient-  
521 ascertainment burden associated with studying rare disorders. Taken together, these attributes  
522 make the present study an excellent complement to previously published case reports on  
523 individuals with 3q29Del; by capturing a larger patient base with systematic assessments, we are  
524 able to more accurately measure the presence of a variety of neuropsychiatric and  
525 neurodevelopmental phenotypes associated with the 3q29 deletion. The findings reported here  
526 indicate that comprehensive neuropsychiatric and neurodevelopmental assessments with gold  
527 standard tools are merited for individuals diagnosed with 3q29Del, and that such assessments  
528 should be the standard of care for this patient population.

## 529 **CONCLUSIONS**

530 The present study confirms previous reports of phenotypes in 3q29Del, as well as  
531 expanding the spectrum of behavioral phenotypes associated with the deletion. We found that  
532 individuals with 3q29Del report a significantly higher prevalence of ASD diagnosis than the  
533 general population, and significantly elevated scores on the SRS, SCQ, ASSQ, and CBCL/ABCL  
534 irrespective of ASD diagnosis indicate significant social disability overall in our study  
535 population. Further, 3q29Del participants showed a distinct profile of ASD-related phenotypes  
536 on the SRS sub-scales, marked by less impaired scores on the Social Motivation sub-scale and  
537 extremely high scores on the Restricted Interests and Repetitive Behaviors sub-scale. This score  
538 profile is consistent between 3q29Del males and females and between 3q29Del participants with



539 and without ASD, suggesting that it may be a hallmark behavioral feature of the syndrome and  
540 providing a potential therapeutic inroad for the treatment of individuals with 3q29Del. Finally,  
541 we identify a high degree of social disability in female 3q29Del participants; the 3q29 deletion  
542 elevates the risk ASD in females (OR=41.8,  $p=4.78E-05$ ) more substantially than in males  
543 (OR=24.6,  $p=6.06E-09$ ). These results demonstrate that there is a benefit to studying rare CNVs  
544 such as 3q29Del; studying a single genomic variant with large effect allows us to control for  
545 genetic etiology and unmask the mechanisms underlying the development of neuropsychiatric  
546 and neurodevelopmental disorders.

547

548

549

550

551

552

553

554

555

556

557

558

559

560

561

562  
563  
564  
565  
566  
567  
568  
569  
570  
571  
572  
573  
574  
575  
576  
577  
578  
579  
580  
581  
582  
583  
584

**Abbreviations**

**ASD:** autism spectrum disorder; **3q29Del:** 3q29 deletion syndrome; **SRS:** Social Responsiveness Scale; **SCQ:** Social Communication Questionnaire; **ASSQ:** Autism Spectrum Screening Questionnaire; **CBCL:** Child Behavior Checklist; **ABCL:** Adult Behavior Checklist; **DSM:** Diagnostic and Statistical Manual; **SZ:** schizophrenia; **ADHD:** attention deficit/hyperactivity disorder; **CNV:** copy number variation; **ID:** intellectual disability; **GDD:** global developmental delay; **MR:** mental retardation; **WS:** Williams Syndrome; **SMS:** Smith-Magenis Syndrome

585

586

587 **DECLARATIONS**

588 **Ethics approval and consent to participate**

589 This study was approved by Emory University's Institutional Review Board (IRB00064133). All  
590 study subjects gave informed consent prior to participating in this study.

591 **Consent for publication**

592 Not applicable.

593 **Availability of data and material**

594 The datasets used and analyzed during the current study are available from the corresponding  
595 author on reasonable request.

596 **Competing interests**

597 CAS reports receiving royalties from Pearson Clinical for the Vineland-3.

598 The remaining authors have no competing interests to disclose.

599 **Funding**

600 Funded by NIH 1R01MH110701-01A1 (Mulle), the Treasure Your Exceptions Project (Zwick),  
601 and NIH T32 GM0008490 (Pollak).

602 **Authors' contributions**

603 RMP performed the statistical analysis, produced all figures and tables, and wrote the  
604 manuscript. MMM collected the data. MPE helped with statistical analyses and interpretation.  
605 MMM, CK, and CAS helped with data interpretation. MEZ and JGM edited the manuscript and  
606 provided guidance on analyzing and interpreting data. JGM was the principle investigator

607 responsible for study direction. All authors participated in commenting on the drafts and have  
608 read and approved the final manuscript.

609 **Acknowledgements**

610 We gratefully acknowledge our study population, the 3q29 deletion community, for their  
611 participation and commitment to research. This manuscript is currently available on the bioRxiv  
612 preprint server (<https://doi.org/10.1101/386243>).

613 We also acknowledge the contributions of the members of the Emory 3q29 Project: Hallie  
614 Averbach, Emily Black, Gary J Bassell, T Lindsey Burrell, Grace Carlock, Tamara Caspary,  
615 Joseph F Cubells, David Cutler, Paul A Dawson, Roberto Espana, Michael J Gambello, Katrina  
616 Goines, Henry R Johnston, Sookyong Koh, Elizabeth J Leslie, Longchuan Li, Bryan Mak,  
617 Tamika Malone, Trenell Mosley, Derek Novacek, Ryan Purcell, Timothy Rutkowski, Rossana  
618 Sanchez, Jason Schroeder, Esra Sefik, Brittney Sholar, Sarah Shultz, Nikisha Sisodiya, Steven  
619 Sloan, Elaine F Walker, Stephen T Warren, David Weinshenker, Zhexing Wen, and Mike  
620 Zinsmeister.

621

622

623

624

625

626

627

628

629

630

631

632

633

634 **REFERENCES**

635 1. Stefansson H, Meyer-Lindenberg A, Steinberg S, Magnusdottir B, Morgen K,  
636 Arnarsdottir S, Bjornsdottir G, Walters GB, Jonsdottir GA, Doyle OM, et al: **CNVs**  
637 **conferring risk of autism or schizophrenia affect cognition in controls.** *Nature* 2014,  
638 **505:361-366.**

639 2. Kendall KM, Rees E, Escott-Price V, Einon M, Thomas R, Hewitt J, O'Donovan MC,  
640 Owen MJ, Walters JTR, Kirov G: **Cognitive Performance Among Carriers of**  
641 **Pathogenic Copy Number Variants: Analysis of 152,000 UK Biobank Subjects.** *Biol*  
642 *Psychiatry* 2017, **82:103-110.**

643 3. Willatt L, Cox J, Barber J, Cabanas ED, Collins A, Donnai D, FitzPatrick DR, Maher E,  
644 Martin H, Parnau J, et al: **3q29 microdeletion syndrome: clinical and molecular**  
645 **characterization of a new syndrome.** *American Journal of Human Genetics* 2005,  
646 **77:154-160.**

647 4. Ballif BC, Theisen A, Coppinger J, Gowans GC, Hersh JH, Madan-Khetarpal S, Schmidt  
648 KR, Tervo R, Escobar LF, Friedrich CA, et al: **Expanding the clinical phenotype of the**  
649 **3q29 microdeletion syndrome and characterization of the reciprocal**  
650 **microduplication.** *Molecular Cytogenetics* 2008, **1:8.**

651 5. Glassford MR, Rosenfeld JA, Freedman AA, Zwick ME, Mulle JG, Unique Rare  
652 Chromosome Disorder Support G: **Novel features of 3q29 deletion syndrome: Results**

- 653           **from the 3q29 registry. *American Journal of Medical Genetics Part A* 2016, **170A**:999-**  
654           1006.
- 655    6.    Cobb W, Anderson A, Turner C, Hoffman RD, Schonberg S, Levin SW: **1.3 Mb de novo**  
656           **deletion in chromosome band 3q29 associated with normal intelligence in a child.**  
657           *European Journal of Medical Genetics* 2010, **53**:415-418.
- 658    7.    Mulle JG: **The 3q29 deletion confers >40-fold increase in risk for schizophrenia.**  
659           *Molecular Psychiatry* 2015, **20**:1028-1029.
- 660    8.    Mulle JG, Dodd AF, McGrath JA, Wolyniec PS, Mitchell AA, Shetty AC, Sobreira NL,  
661           Valle D, Rudd MK, Satten G, et al: **Microdeletions of 3q29 confer high risk for**  
662           **schizophrenia. *American Journal of Human Genetics* 2010, **87**:229-236.**
- 663    9.    Marshall CR, Howrigan DP, Merico D, Thiruvahindrapuram B, Wu W, Greer DS, Antaki  
664           D, Shetty A, Holmans PA, Pinto D, et al: **Contribution of copy number variants to**  
665           **schizophrenia from a genome-wide study of 41,321 subjects. *Nature Genetics* 2017,**  
666           **49:27-35.**
- 667    10.   Kirov G, Pocklington AJ, Holmans P, Ivanov D, Ikeda M, Ruderfer D, Moran J,  
668           Chambert K, Toncheva D, Georgieva L, et al: **De novo CNV analysis implicates**  
669           **specific abnormalities of postsynaptic signalling complexes in the pathogenesis of**  
670           **schizophrenia. *Mol Psychiatry* 2012, **17**:142-153.**
- 671    11.   Szatkiewicz JP, O'Dushlaine C, Chen G, Chambert K, Moran JL, Neale BM, Fromer M,  
672           Ruderfer D, Akterin S, Bergen SE, et al: **Copy number variation in schizophrenia in**  
673           **Sweden. *Molecular Psychiatry* 2014, **19**:762.**
- 674    12.   Cox DM, Butler MG: **A clinical case report and literature review of the 3q29**  
675           **microdeletion syndrome. *Clinical dysmorphology* 2015, **24**:89-94.**

- 676 13. Città S, Buono S, Greco D, Barone C, Alfei E, Bulgheroni S, Usilla A, Pantaleoni C,  
677 Romano C: **3q29 microdeletion syndrome: Cognitive and behavioral phenotype in**  
678 **four patients.** *American Journal of Medical Genetics Part A* 2013, **161A**:3018-3022.
- 679 14. Sagar A, Bishop JR, Tessman DC, Guter S, Martin CL, Cook EH: **Co-occurrence of**  
680 **autism, childhood psychosis, and intellectual disability associated with a de novo**  
681 **3q29 microdeletion.** *American Journal of Medical Genetics Part A* 2013, **161A**:845-  
682 849.
- 683 15. Quintero-Rivera F, Sharifi-Hannauer P, Martinez-Agosto JA: **Autistic and psychiatric**  
684 **findings associated with the 3q29 microdeletion syndrome: case report and review.**  
685 *American Journal of Medical Genetics Part A* 2010, **152A**:2459-2467.
- 686 16. Biamino E, Di Gregorio E, Belligni EF, Keller R, Riberi E, Gandione M, Calcia A,  
687 Mancini C, Giorgio E, Cavalieri S, et al: **A novel 3q29 deletion associated with autism,**  
688 **intellectual disability, psychiatric disorders, and obesity.** *American Journal of*  
689 *Medical Genetics Part B, Neuropsychiatric Genetics* 2016, **171B**:290-299.
- 690 17. Itsara A, Cooper GM, Baker C, Girirajan S, Li J, Absher D, Krauss RM, Myers RM,  
691 Ridker PM, Chasman DI, et al: **Population analysis of large copy number variants and**  
692 **hotspots of human genetic disease.** *American Journal of Human Genetics* 2009,  
693 **84**:148-161.
- 694 18. Sanders SJ, He X, Willsey AJ, Ercan-Sencicek AG, Samocha KE, Cicek AE, Murtha  
695 MT, Bal VH, Bishop SL, Dong S, et al: **Insights into Autism Spectrum Disorder**  
696 **Genomic Architecture and Biology from 71 Risk Loci.** *Neuron* 2015, **87**:1215-1233.
- 697 19. Schneider M, Debbané M, Bassett AS, Chow EWC, Fung WLA, van den Bree M, Owen  
698 M, Murphy KC, Niarchou M, Kates WR, et al: **Psychiatric disorders from childhood to**

- 699            **adulthood in 22q11.2 deletion syndrome: results from the International Consortium**  
700            **on Brain and Behavior in 22q11.2 Deletion Syndrome.** *The American Journal of*  
701            *Psychiatry* 2014, **171**:627-639.
- 702    20.    McDonald-McGinn DM, Sullivan KE, Marino B, Philip N, Swillen A, Vorstman JA,  
703            Zackai EH, Emanuel BS, Vermeesch JR, Morrow BE, et al: **22q11.2 deletion syndrome.**  
704            *Nat Rev Dis Primers* 2015, **1**:15071.
- 705    21.    D'Angelo D, Lebon S, Chen Q, Martin-Brevet S, Snyder LG, Hippolyte L, Hanson E,  
706            Maillard AM, Faucett WA, Mace A, et al: **Defining the Effect of the 16p11.2**  
707            **Duplication on Cognition, Behavior, and Medical Comorbidities.** *JAMA Psychiatry*  
708            2016, **73**:20-30.
- 709    22.    Hanson E, Bernier R, Porche K, Jackson FI, Goin-Kochel RP, Snyder LG, Snow AV,  
710            Wallace AS, Campe KL, Zhang Y, et al: **The cognitive and behavioral phenotype of**  
711            **the 16p11.2 deletion in a clinically ascertained population.** *Biological Psychiatry*  
712            2015, **77**:785-793.
- 713    23.    Mervis CB, Klein-Tasman BP, Huffman MJ, Velleman SL, Pitts CH, Henderson DR,  
714            Woodruff-Borden J, Morris CA, Osborne LR: **Children with 7q11.23 duplication**  
715            **syndrome: psychological characteristics.** *American Journal of Medical Genetics Part A*  
716            2015, **167**:1436-1450.
- 717    24.    Brunetti-Pierri N, Berg JS, Scaglia F, Belmont J, Bacino CA, Sahoo T, Lalani SR,  
718            Graham B, Lee B, Shinawi M, et al: **Recurrent reciprocal 1q21.1 deletions and**  
719            **duplications associated with microcephaly or macrocephaly and developmental and**  
720            **behavioral abnormalities.** *Nature Genetics* 2008, **40**:1466-1471.



- 721 25. Constantino JN, Todd RD: *The social responsiveness scale manual*. 2 edn. Los Angeles:  
722 Western Psychological Services; 2012.
- 723 26. Rutter M, Bailey A, Lord C: *The Social Communication Questionnaire - Manual*. Los  
724 Angeles: Western Psychological Services; 2003.
- 725 27. Ehlers S, Gillberg C, Wing L: **A screening questionnaire for Asperger syndrome and**  
726 **other high-functioning Autism Spectrum Disorders in school age children.** *Journal of*  
727 *Autism and Developmental Disorders* 1999, **29**.
- 728 28. Achenbach TM, Rescorla LA: *Manual for the ASEBA School-Age Forms & Profiles*.  
729 Burlington, VT: University of Vermont, Research Center for Children, Youth and  
730 Families; 2001.
- 731 29. Achenbach TM, Rescorla LA: *Manual for the ASEBA Adult Forms & Profiles*.  
732 Burlington, VT: University of Vermont, Research Center for Children, Youth and  
733 Families; 2003.
- 734 30. R Core Team: **R: A language and environment for statistical computing.** *R*  
735 *Foundation for Statistical Computing, Vienna, Austria* 2008.
- 736 31. Christensen RHB: **ordinal - Regression Models for Ordinal Data.** *R package version*  
737 *20156-28* 2015.
- 738 32. Nakazawa M: **fmsb: Functions for medical statistics book with some demographic**  
739 **data.** *R package version 063* 2018.
- 740 33. Sievert C, Parmer C, Hocking T, Chamberlain S, Ram K, Corvellec M, Despouy P:  
741 **plotly: Create Interactive Web Graphics via ‘plotly.js’.** *R package version 460* 2017.
- 742 34. Wickham H: *ggplot2: Elegant Graphics for Data Analysis*. New York: Springer-Verlag;  
743 2009.

- 744 35. Kessler RC, Birnbaum H, Demler O, Falloon IR, Gagnon E, Guyer M, Howes MJ,  
745 Kendler KS, Shi L, Walters E, Wu EQ: **The prevalence and correlates of nonaffective**  
746 **psychosis in the National Comorbidity Survey Replication (NCS-R).** *Biol Psychiatry*  
747 2005, **58**:668-676.
- 748 36. Wu EQ, Shi L, Birnbaum H, Hudson T, Kessler R: **Annual prevalence of diagnosed**  
749 **schizophrenia in the USA: a claims data analysis approach.** *Psychol Med* 2006,  
750 **36**:1535-1540.
- 751 37. Desai PR, Lawson KA, Barner JC, Rascati KL: **Estimating the direct and indirect costs**  
752 **for community-dwelling patients with schizophrenia.** *Journal of Pharmaceutical*  
753 *Health Services Research* 2013, **4**:187-194.
- 754 38. Saha S, Chant D, Welham J, McGrath J: **A systematic review of the prevalence of**  
755 **schizophrenia.** *PLoS Med* 2005, **2**:e141.
- 756 39. Moreno-Kustner B, Martin C, Pastor L: **Prevalence of psychotic disorders and its**  
757 **association with methodological issues. A systematic review and meta-analyses.**  
758 *PLoS One* 2018, **13**:e0195687.
- 759 40. Merikangas KR, He JP, Burstein M, Swanson SA, Avenevoli S, Cui L, Benjet C,  
760 Georgiades K, Swendsen J: **Lifetime prevalence of mental disorders in U.S.**  
761 **adolescents: results from the National Comorbidity Survey Replication--Adolescent**  
762 **Supplement (NCS-A).** *J Am Acad Child Adolesc Psychiatry* 2010, **49**:980-989.
- 763 41. Christensen DL, Braun KVN, Baio J, Bilder D, Charles J, Constantino JN, Daniels J,  
764 Durkin MS, Fitzgerald RT, Kurzius-Spencer M, et al: **Prevalence and Characteristics**  
765 **of Autism Spectrum Disorder Among Children Aged 8 Years - Autism and**

- 766           **Developmental Disabilities Monitoring Network, 11 Sites, United States, 2012.**  
767           *MMWR Surveill Summ* 2018, **65**:1-23.
- 768   42.   Torske T, Naerland T, Oie MG, Stenberg N, Andreassen OA: **Metacognitive Aspects of**  
769           **Executive Function Are Highly Associated with Social Functioning on Parent-Rated**  
770           **Measures in Children with Autism Spectrum Disorder.** *Front Behav Neurosci* 2017,  
771           **11**:258.
- 772   43.   Murphy MM, Lindsey Burrell T, Cubells JF, Espana RA, Gambello MJ, Goines KCB,  
773           Klaiman C, Li L, Novacek DM, Papetti A, et al: **Study protocol for The Emory 3q29**  
774           **Project: evaluation of neurodevelopmental, psychiatric, and medical symptoms in**  
775           **3q29 deletion syndrome.** *BMC Psychiatry* 2018, **18**:183.
- 776   44.   Rogers BT, Msali ME, Buck GM, Lyon NR, Norris MK, Roland JMA, Gingell RL,  
777           Cleveland DC, Pieroni DR: **Neurodevelopmental outcome of infants with hypoplastic**  
778           **left heart syndrome.** *The Journal of Pediatrics* 1995:496-498.
- 779   45.   Forbess JM, Visconti KJ, Hancock-Friesen C, Howe RC, Bellinger DC, Jonas RA:  
780           **Neurodevelopmental outcome after congenital heart surgery: Results from an**  
781           **institutional registry.** *Circulation* 2002, **106**:I-95-I-102.
- 782   46.   Wernovsky G, Shillingford AJ, Gaynor JW: **Central nervous system outcomes in**  
783           **children with complex congenital heart disease.** *Current Opinions in Cardiology*  
784           2005:94-99.
- 785   47.   Karsdorp PA, Everaerd W, Kindt M, Mulder BJ: **Psychological and cognitive**  
786           **functioning in children and adolescents with congenital heart disease: a meta-**  
787           **analysis.** *J Pediatr Psychol* 2007, **32**:527-541.

- 788 48. Shillingford AJ, Glanzman MM, Ittenbach RF, Clancy RR, Gaynor JW, Wernovsky G:  
789 **Inattention, hyperactivity, and school performance in a population of school-age**  
790 **children with complex congenital heart disease.** *Pediatrics* 2008, **121**:e759-767.
- 791 49. Kovacs AH, Saidi AS, Kuhl EA, Sears SF, Silversides C, Harrison JL, Ong L, Colman J,  
792 Oechslin E, Nolan RP: **Depression and anxiety in adult congenital heart disease:**  
793 **predictors and prevalence.** *Int J Cardiol* 2009, **137**:158-164.
- 794 50. Bishop SL, Thurm A, Farmer C, Lord C: **Autism Spectrum Disorder, Intellectual**  
795 **Disability, and Delayed Walking.** *Pediatrics* 2016, **137**:e20152959.
- 796 51. De Rubeis S, He X, Goldberg AP, Poultney CS, Samocha K, Cicek AE, Kou Y, Liu L,  
797 Fromer M, Walker S, et al: **Synaptic, transcriptional and chromatin genes disrupted**  
798 **in autism.** *Nature* 2014, **515**:209-215.
- 799 52. Noterdaeme M, Minow F, Amorosa H: **[Applicability of the Child Behavior Checklist**  
800 **in developmentally delayed children].** *Z Kinder Jugendpsychiatr Psychother* 1999,  
801 **27**:183-188.
- 802 53. Mazefsky CA, Anderson R, Conner CM, Minshew N: **Child Behavior Checklist Scores**  
803 **for School-Aged Children with Autism: Preliminary Evidence of Patterns**  
804 **Suggesting the Need for Referral.** *Journal of psychopathology and behavioral*  
805 *assessment* 2011, **33**:31-37.
- 806 54. Bruining H, Eijkemans MJ, Kas MJ, Curran SR, Vorstman JA, Bolton PF: **Behavioral**  
807 **signatures related to genetic disorders in autism.** *Mol Autism* 2014, **5**:11.
- 808 55. Klein-Tasman BP, Mervis CB: **Autism Spectrum Symptomatology Among Children**  
809 **with Duplication 7q11.23 Syndrome.** *J Autism Dev Disord* 2018, **48**:1982-1994.

- 810 56. Hidding E, Swaab H, de Sonnevile LM, van Engeland H, Sijmens-Morcus ME, Klaassen  
811 PW, Duijff SN, Vorstman JA: **Intellectual functioning in relation to autism and**  
812 **ADHD symptomatology in children and adolescents with 22q11.2 deletion**  
813 **syndrome.** *J Intellect Disabil Res* 2015, **59**:803-815.
- 814 57. Vorstman JA, Breetvelt EJ, Thode KI, Chow EW, Bassett AS: **Expression of autism**  
815 **spectrum and schizophrenia in patients with a 22q11.2 deletion.** *Schizophr Res* 2013,  
816 **143**:55-59.
- 817 58. Vorstman JA, Morcus ME, Duijff SN, Klaassen PW, Heineman-de Boer JA, Beemer FA,  
818 Swaab H, Kahn RS, van Engeland H: **The 22q11.2 deletion in children: high rate of**  
819 **autistic disorders and early onset of psychotic symptoms.** *J Am Acad Child Adolesc*  
820 *Psychiatry* 2006, **45**:1104-1113.
- 821 59. Qiao Y, Riendeau N, Koochek M, Liu X, Harvard C, Hildebrand MJ, Holden JJ, Rajcan-  
822 Separovic E, Lewis ME: **Phenomic determinants of genomic variation in autism**  
823 **spectrum disorders.** *J Med Genet* 2009, **46**:680-688.
- 824 60. Flor J, Bellando J, Lopez M, Shui A: **Developmental functioning and medical Co-**  
825 **morbidity profile of children with complex and essential autism.** *Autism Res* 2017,  
826 **10**:1344-1352.
- 827 61. Finlay WML, Lyons E: **Methodological issues in interviewing and using self-report**  
828 **questionnaires with people with mental retardation.** *Psychological Assessment* 2001,  
829 **13**:319-335.
- 830 62. Fisher MH, Mello MP, Dykens EM: **Who reports it best? A comparison between**  
831 **parent-report, self-report, and the real life social behaviors of adults with Williams**  
832 **syndrome.** *Research in Developmental Disabilities* 2014, **35**:3276-3284.

- 833 63. Lincoln AJ, Searcy YM, Jones W, Lord C: **Social interaction behaviors discriminate**  
834 **young children with autism and Williams syndrome.** *J Am Acad Child Adolesc*  
835 *Psychiatry* 2007, **46**:323-331.
- 836 64. Riby DM, Hanley M, Kirk H, Clark F, Little K, Fleck R, Janes E, Kelso L, O'Kane F,  
837 Cole-Fletcher R, et al: **The interplay between anxiety and social functioning in**  
838 **Williams syndrome.** *J Autism Dev Disord* 2014, **44**:1220-1229.
- 839 65. van der Fluit F, Gaffrey MS, Klein-Tasman BP: **Social Cognition in Williams**  
840 **Syndrome: Relations between Performance on the Social Attribution Task and**  
841 **Cognitive and Behavioral Characteristics.** *Front Psychol* 2012, **3**:197.
- 842 66. Morris CA, Mervis CB, Paciorkowski AP, Abdul-Rahman O, Dugan SL, Rope AF, Bader  
843 P, Hendon LG, Velleman SL, Klein-Tasman BP, Osborne LR: **7q11.23 Duplication**  
844 **syndrome: Physical characteristics and natural history.** *Am J Med Genet A* 2015,  
845 **167a**:2916-2935.
- 846 67. Sanders SJ, Ercan-Sencicek AG, Hus V, Luo R, Murtha MT, Moreno-De-Luca D, Chu  
847 SH, Moreau MP, Gupta AR, Thomson SA, et al: **Multiple recurrent de novo CNVs,**  
848 **including duplications of the 7q11.23 Williams syndrome region, are strongly**  
849 **associated with autism.** *Neuron* 2011, **70**:863-885.
- 850 68. Niarchou M, Chawner S, Doherty JL, Maillard AM, Jacquemont S, Chung WK, Green-  
851 Snyder L, Bernier RA, Goin-Kochel RP, Hanson E, et al: **Psychiatric disorders in**  
852 **children with 16p11.2 deletion and duplication.** *Transl Psychiatry* 2019, **9**:8.
- 853 69. Zufferey F, Sherr EH, Beckmann ND, Hanson E, Maillard AM, Hippolyte L, Macé A,  
854 Ferrari C, Kutalik Z, Andrieux J, et al: **A 600 kb deletion syndrome at 16p11.2 leads to**

- 855            **energy imbalance and neuropsychiatric disorders.** *Journal of Medical Genetics* 2012,  
856            **49:660-668.**
- 857    70.    Green Snyder L, D'Angelo D, Chen Q, Bernier R, Goin-Kochel RP, Wallace AS, Gerdtts  
858            J, Kanne S, Berry L, Blaskey L, et al: **Autism Spectrum Disorder, Developmental and**  
859            **Psychiatric Features in 16p11.2 Duplication.** *J Autism Dev Disord* 2016, **46:2734-**  
860            **2748.**
- 861    71.    Nag HE, Nordgren A, Anderlid BM, Nærland T: **Reversed gender ratio of autism**  
862            **spectrum disorder in Smith-Magenis syndrome.** *Mol Autism* 2018, **9:1.**
- 863    72.    Schreiner MJ, Karlsgodt KH, Uddin LQ, Chow C, Congdon E, Jalbrzikowski M, Bearden  
864            **CE: Default mode network connectivity and reciprocal social behavior in 22q11.2**  
865            **deletion syndrome.** *Soc Cogn Affect Neurosci* 2014, **9:1261-1267.**
- 866    73.    Niklasson L, Rasmussen P, Oskarsdottir S, Gillberg C: **Autism, ADHD, mental**  
867            **retardation and behavior problems in 100 individuals with 22q11 deletion**  
868            **syndrome.** *Res Dev Disabil* 2009, **30:763-773.**
- 869    74.    Sobin C, Kiley-Brabeck K, Monk SH, Khuri J, Karayiorgou M: **Sex differences in the**  
870            **behavior of children with the 22q11 deletion syndrome.** *Psychiatry Res* 2009, **166:24-**  
871            **34.**
- 872    75.    Zablotsky B, Black LI, Blumberg SJ: **Estimated Prevalence of Children With**  
873            **Diagnosed Developmental Disabilities in the United States, 2014-2016.** *NCHS Data*  
874            *Brief* 2017:1-8.
- 875
- 876
- 877

878 **Additional Files**

879 File name: Supplemental Information

880 File format: Microsoft Word document (.docx)

881 Title of data: Supplementary figures and tables

882 Description of data: Supplementary figures are (S1) SCQ scores split by ASD status, sex, and

883 ASD status/sex, (S2) CBCL/ABCL Withdrawn sub-scale scores split by genotype, sex, and ASD

884 status, and (S3) geographic distribution of study participants with 3q29Del. Supplementary

885 tables are (S1) questionnaire demographics for the medical questionnaire, SRS, SCQ, ASSQ, and

886 CBCL/ABCL; (S2 and S3) sensitivity analysis description and results for effect of 3q29Del self-

887 registrants; (S4) comparison of scores on all four scales for 3q29Del versus control; (S5) SRS

888 score comparison stratified by ASD status and sex; (S6) SCQ score comparison stratified by

889 ASD status and sex; (S7) CBCL/ABCL DSM-oriented sub-scale score comparison; (S8)

890 contribution of congenital heart defects to phenotypes of interest; (S9) test for confounding

891 factors contributing to symptomology questionnaire scores; (S10) CBCL/ABCL Withdrawn sub-

892 scale score comparison; (S11) heart defects present in study sample; (S12) comparison of 3q29

893 registry-leveraged and gold-standard phenotyping measures; and (S13) comparison of

894 CBC/ABCL sub-scale scores between 3q29Del and 22q11.2 deletion.

895

896

897

898

899

900



901 **Table 2: Self-reported neuropsychiatric diagnoses.**

|                                      | 3q29 Deletion Syndrome |            |            | Control    |            |            | P value; 3q29Del vs. Control |
|--------------------------------------|------------------------|------------|------------|------------|------------|------------|------------------------------|
|                                      | Total                  | Male       | Female     | Total      | Male       | Female     |                              |
| GDD/MR (n, %)                        |                        |            |            |            |            |            | <2.20E-16                    |
| Yes                                  | 55 (59.1%)             | 31 (57.4%) | 24 (61.5%) | 1.14%*     | 1.48%*     | 0.90%*     |                              |
| No                                   | 38 (40.9%)             | 23 (42.6%) | 15 (38.5%) | 64 (100%)  | 33 (100%)  | 31 (100%)  |                              |
| ASD (n, %)                           |                        |            |            |            |            |            | <2.20E-16                    |
| Yes                                  | 27 (29.0%)             | 20 (37.0%) | 7 (17.9%)  | 1.47%*     | 2.34%*     | 0.52%*     |                              |
| No                                   | 66 (71.0%)             | 34 (63.0%) | 32 (82.1%) | 64 (100%)  | 33 (100%)  | 31 (100%)  |                              |
| Anxiety (n, %)                       |                        |            |            |            |            |            | 0.001                        |
| Yes                                  | 26 (28.0%)             | 15 (27.8%) | 11 (28.2%) | 4 (6.2%)   | 2 (6.1%)   | 2 (6.5%)   |                              |
| No                                   | 67 (72.0%)             | 39 (72.2%) | 28 (71.8%) | 60 (93.8%) | 31 (93.9%) | 29 (93.5%) |                              |
| Bipolar/Manic Depression (n, %)      |                        |            |            |            |            |            | 0.146                        |
| Yes                                  | 4 (4.3%)               | 2 (3.7%)   | 2 (5.1%)   | 0 (0%)     | 0 (0%)     | 0 (0%)     |                              |
| No                                   | 89 (95.7%)             | 52 (96.3%) | 37 (94.9%) | 64 (100%)  | 33 (100%)  | 31 (100%)  |                              |
| Conduct Disorder (n, %)              |                        |            |            |            |            |            | 1.00                         |
| Yes                                  | 1 (1.1%)               | 1 (1.9%)   | 0 (0%)     | 0 (0%)     | 0 (0%)     | 0 (0%)     |                              |
| No                                   | 92 (98.9%)             | 53 (98.1%) | 39 (100%)  | 64 (100%)  | 33 (100%)  | 31 (100%)  |                              |
| Depression (n, %)                    |                        |            |            |            |            |            | 1.00                         |
| Yes                                  | 6 (6.5%)               | 2 (3.7%)   | 4 (10.3%)  | 4 (6.2%)   | 4 (12.1%)  | 0 (0%)     |                              |
| No                                   | 87 (93.5%)             | 52 (96.3%) | 35 (89.7%) | 60 (93.8%) | 29 (87.9%) | 31 (100%)  |                              |
| Oppositional Defiant Disorder (n, %) |                        |            |            |            |            |            | 0.271                        |
| Yes                                  | 3 (3.2%)               | 2 (3.7%)   | 1 (2.6%)   | 0 (0%)     | 0 (0%)     | 0 (0%)     |                              |
| No                                   | 90 (96.8%)             | 52 (96.3%) | 38 (97.4%) | 64 (100%)  | 33 (100%)  | 31 (100%)  |                              |
| Panic Attacks (n, %)                 |                        |            |            |            |            |            | 0.045                        |
| Yes                                  | 12 (12.9%)             | 9 (16.7%)  | 4 (10.3%)  | 2 (3.2%)   | 0 (0%)     | 2 (6.5%)   |                              |
| No                                   | 81 (87.1%)             | 45 (83.3%) | 35 (89.7%) | 62 (96.8%) | 33 (100%)  | 29 (93.5%) |                              |
| Schizophrenia (n, %)                 |                        |            |            |            |            |            | 0.146                        |

|     |            |            |            |           |           |           |
|-----|------------|------------|------------|-----------|-----------|-----------|
| Yes | 4 (4.3%)   | 1 (1.9%)   | 3 (7.7%)   | 0 (0%)    | 0 (0%)    | 0 (0%)    |
| No  | 89 (95.7%) | 53 (98.1%) | 36 (92.3%) | 64 (100%) | 33 (100%) | 31 (100%) |

902 Characteristics of self-reported neuropsychiatric diagnoses in study participants with 3q29Del and controls. Asterisks indicate where  
 903 3q29Del was compared to general population prevalence values [41, 75]. P values were calculated with one-sample proportion test  
 904 with Yates' continuity correction when comparing to population prevalence and Fisher's exact test when comparing to controls.

905  
 906  
 907  
 908  
 909  
 910  
 911  
 912  
 913  
 914  
 915  
 916  
 917

918 **Table 3: SRS sub-scale score comparison stratified by genotype, ASD status, and sex.**

|                          | Social Awareness |          | Social Cognition |           | Social Communication |           | Social Motivation |          | RRB           |           | SCI           |           |
|--------------------------|------------------|----------|------------------|-----------|----------------------|-----------|-------------------|----------|---------------|-----------|---------------|-----------|
|                          | Mean ± SD        | P value  | Mean ± SD        | P value   | Mean ± SD            | P value   | Mean ± SD         | P value  | Mean ± SD     | P value   | Mean ± SD     | P value   |
| <b>Genotype</b>          |                  |          |                  |           |                      |           |                   |          |               |           |               |           |
| Control                  | 47.04 ± 8.88     | -        | 45.27 ± 7.64     | -         | 45.88 ± 8.14         | -         | 46.13 ± 7.66      | -        | 47.66 ± 8.51  | -         | 45.50 ± 7.74  | -         |
| 3q29Del                  | 67.33 ± 13.28    | 1.45E-13 | 69.06 ± 15.51    | 1.20E-15  | 69.69 ± 13.92        | <2.00E-16 | 62.10 ± 13.52     | 1.62E-10 | 77.31 ± 14.25 | <2.00E-16 | 69.52 ± 14.63 | <2.00E-16 |
| <b>Sex</b>               |                  |          |                  |           |                      |           |                   |          |               |           |               |           |
| Male control             | 45.97 ± 9.15     | -        | 45.23 ± 7.42     | -         | 45.73 ± 6.34         | -         | 46.57 ± 6.58      | -        | 47.63 ± 5.59  | -         | 45.37 ± 6.60  | -         |
| Male 3q29Del             | 69.92 ± 13.92    | 7.61E-09 | 71.08 ± 17.65    | 1.07E-08  | 72.12 ± 15.47        | 1.74E-10  | 63.92 ± 15.23     | 3.39E-06 | 79.92 ± 14.82 | 2.84E-13  | 72.00 ± 16.34 | 7.12E-10  |
| Female control           | 48.27 ± 8.56     | -        | 45.31 ± 8.03     | -         | 46.04 ± 9.95         | -         | 45.62 ± 8.85      | -        | 47.69 ± 11.08 | -         | 45.65 ± 9.01  | -         |
| Female 3q29Del           | 64.27 ± 12.08    | 4.52E-06 | 66.68 ± 12.51    | 1.29E-08  | 66.82 ± 11.52        | 2.99E-08  | 59.95 ± 11.14     | 1.36E-05 | 74.23 ± 13.22 | 1.30E-09  | 66.59 ± 12.02 | 1.87E-08  |
| <b>ASD Status</b>        |                  |          |                  |           |                      |           |                   |          |               |           |               |           |
| Control                  | 47.04 ± 8.88     | -        | 45.27 ± 7.64     | -         | 45.88 ± 8.14         | -         | 46.13 ± 7.66      | -        | 47.66 ± 8.51  | -         | 45.50 ± 7.74  | -         |
| No ASD diagnosis 3q29Del | 62.61 ± 13.20    | 5.17E-09 | 64.10 ± 15.80    | 5.77E-11  | 64.61 ± 13.54        | 1.20E-12  | 58.00 ± 13.15     | 1.42E-06 | 70.58 ± 11.50 | <2.00E-16 | 64.13 ± 14.39 | 5.19E-12  |
| ASD diagnosis 3q29Del    | 75.94 ± 8.33     | 2.43E-15 | 78.12 ± 10.18    | <2.00E-16 | 78.94 ± 9.18         | <2.00E-16 | 69.59 ± 10.99     | 5.12E-12 | 89.59 ± 10.04 | <2.00E-16 | 79.35 ± 9.02  | <2.00E-16 |

919 Comparison of mean scores on the SRS sub-scales between study participants with 3q29Del and controls. 3q29Del participants were  
920 stratified by ASD status and sex for further analysis. P values were calculated using simple linear regression, adjusting for age, race,  
921 and sex.

922

923

924

925

926

927

928

929

930

931

932

933

934

935

936 **Figure Titles and Legends**

937 **Figure 1. Score distribution for 3q29Del and controls on the SRS, SCQ, ASSQ, and**

938 **CBCL/ABCL.** Total scores on the SRS (n=48 3q29Del, 56 control), SCQ (n=33 3q29Del, 46  
939 control), ASSQ (n=24 3q29Del, 35 control), and CBCL/ABCL (n=48 3q29Del, 57 control) for  
940 registry participants. Self-reported diagnosis of ASD is denoted by shape (circle/ASD,  
941 triangle/no ASD), and sex of participant is denoted by color (red/female, blue/male). Controls are  
942 shown in black.

943 **Figure 2. Comparison of ASD prevalence and SRS scores between 3q29Del and controls. A)**

944 Proportion of participants with 3q29Del self-reporting a diagnosis of ASD (not all respondents  
945 completed symptom questionnaires); 27 cases report an ASD diagnosis (green), comprised of 20  
946 males (blue) and 7 females (red). Compared to general population frequencies (black), cases  
947 report significantly higher incidence of ASD. **B)** SRS scores split by control (n=59), 3q29Del not  
948 reporting an ASD diagnosis (n=31), and 3q29Del reporting an ASD diagnosis (n=17), showing a  
949 significant association between self-reported diagnostic status and SRS score. **C)** SRS scores  
950 split by sex, with control (n=59), 3q29Del female (n=22), and 3q29Del male (n=26), showing a  
951 lack of sex bias in scores for 3q29Del participants. **D)** SRS scores split by sex and self-reported  
952 diagnostic status, with control (n=59), 3q29Del female reporting ASD (n=5), 3q29Del female not  
953 reporting ASD (n=17), 3q29Del male reporting ASD (n=12), and 3q29Del male not reporting  
954 ASD (n=14), showing inflated scores for 3q29Del participants irrespective of sex or diagnostic  
955 status. \*\*\*, p<0.001

956 **Figure 3. Comparison of SRS sub-scales and CBCL/ABCL DSM-oriented sub-scales**

957 **between 3q29Del and controls. A)** Profile of individuals with 3q29Del (n=48) and controls

958 (n=59) across SRS sub-scales, showing moderate to severe impairment of 3q29Del participants

959 in all domains except Social Motivation (RRB, Restricted Interests and Repetitive Behaviors;  
960 SCI, Social Communication and Interaction). **B)** Profile of 3q29Del males (n=26) and females  
961 (n=22) and controls (n=59) across SRS sub-scales, showing that 3q29Del males and females  
962 both score significantly higher than controls and that there are no significant differences in score  
963 between males and females. **C)** Profile of 3q29Del participants reporting an ASD diagnosis  
964 (n=17) and participants not reporting an ASD diagnosis (n=31) and controls (n=59) across SRS  
965 sub-scales, showing that 3q29Del participants score significantly higher than controls  
966 irrespective of ASD status, with 3q29Del participants reporting an ASD diagnosis scoring  
967 significantly higher than those not reporting an ASD diagnosis. **D)** Profile of 3q29Del  
968 participants (n=48) and controls (n=57) across 3 DSM-oriented sub-scales from the CBCL and  
969 ABCL, showing significantly increased pathology in 3q29Del participants in all 3 domains. \*\*\*,  
970  $p < 0.001$

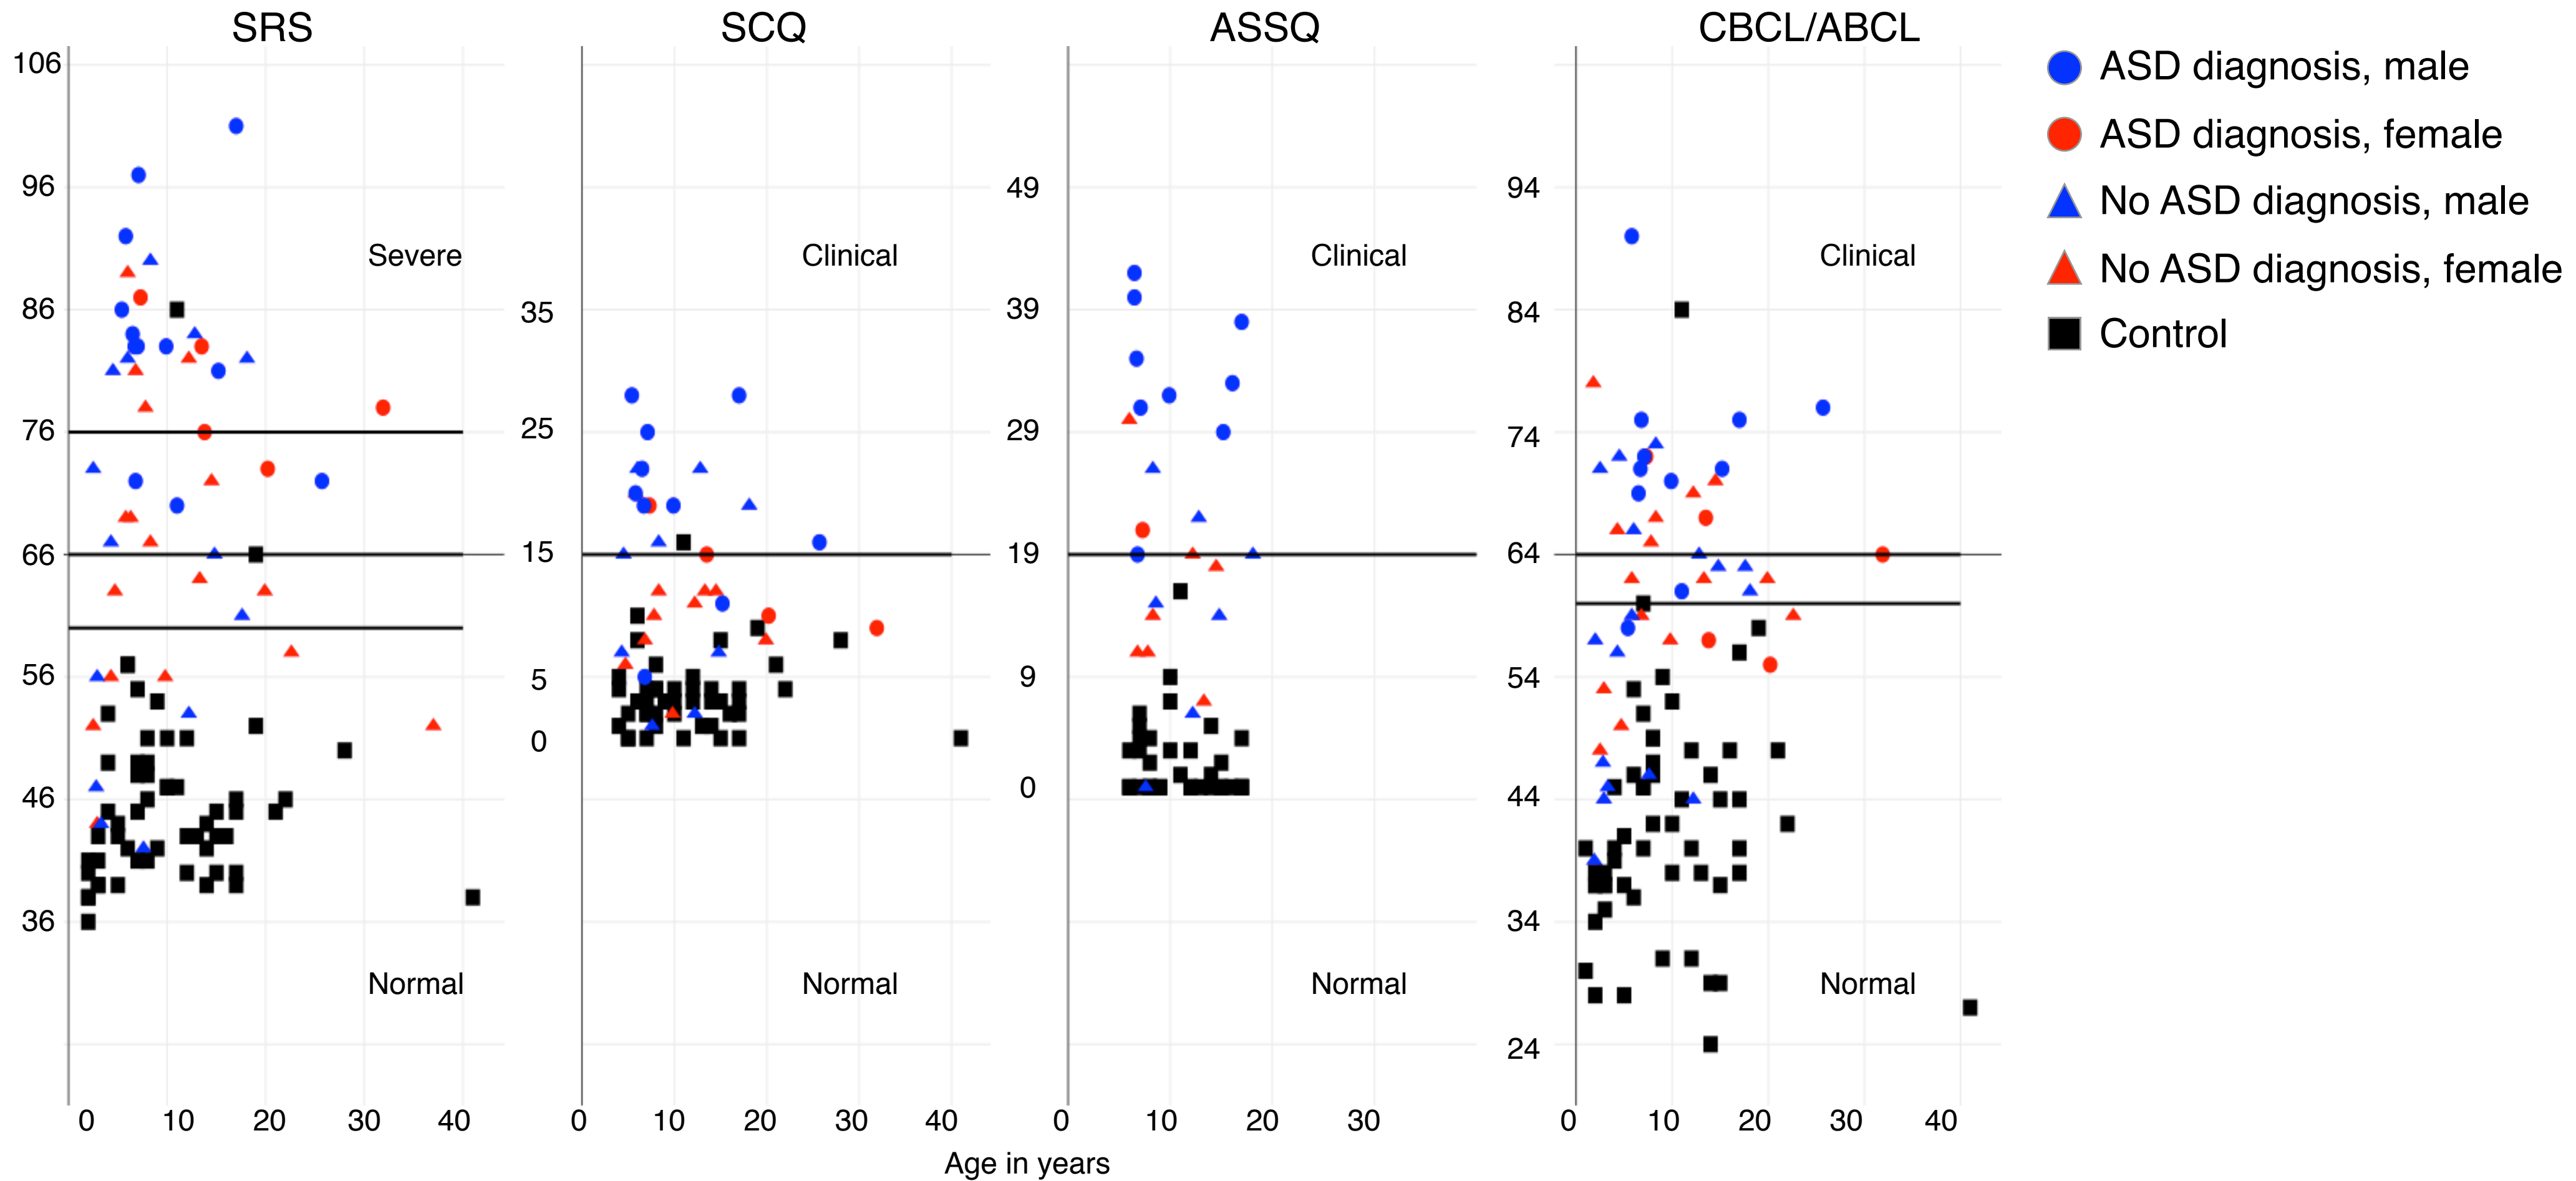

**A**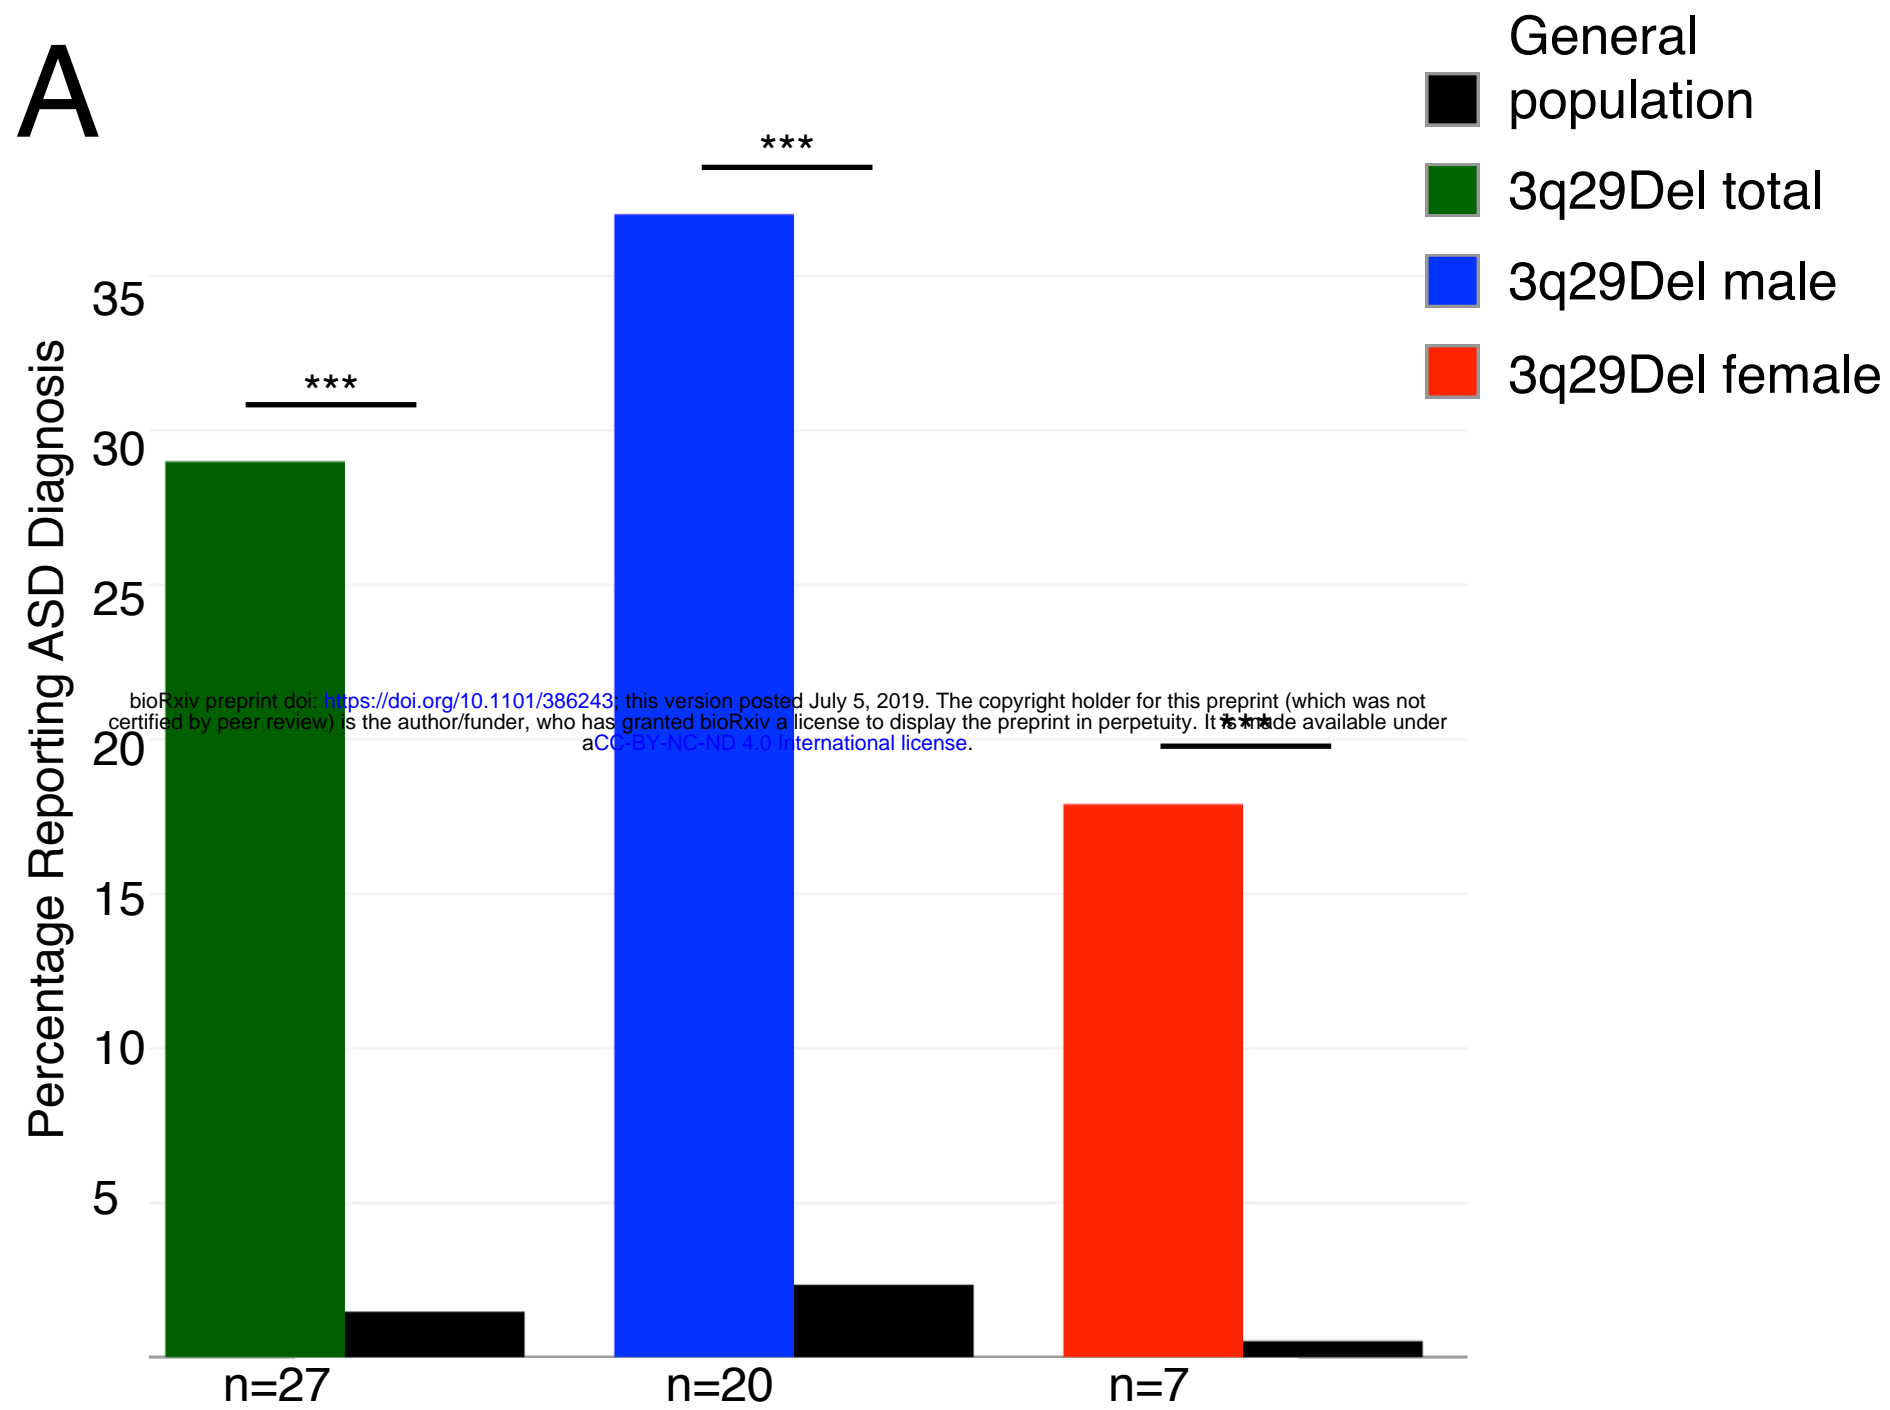**B**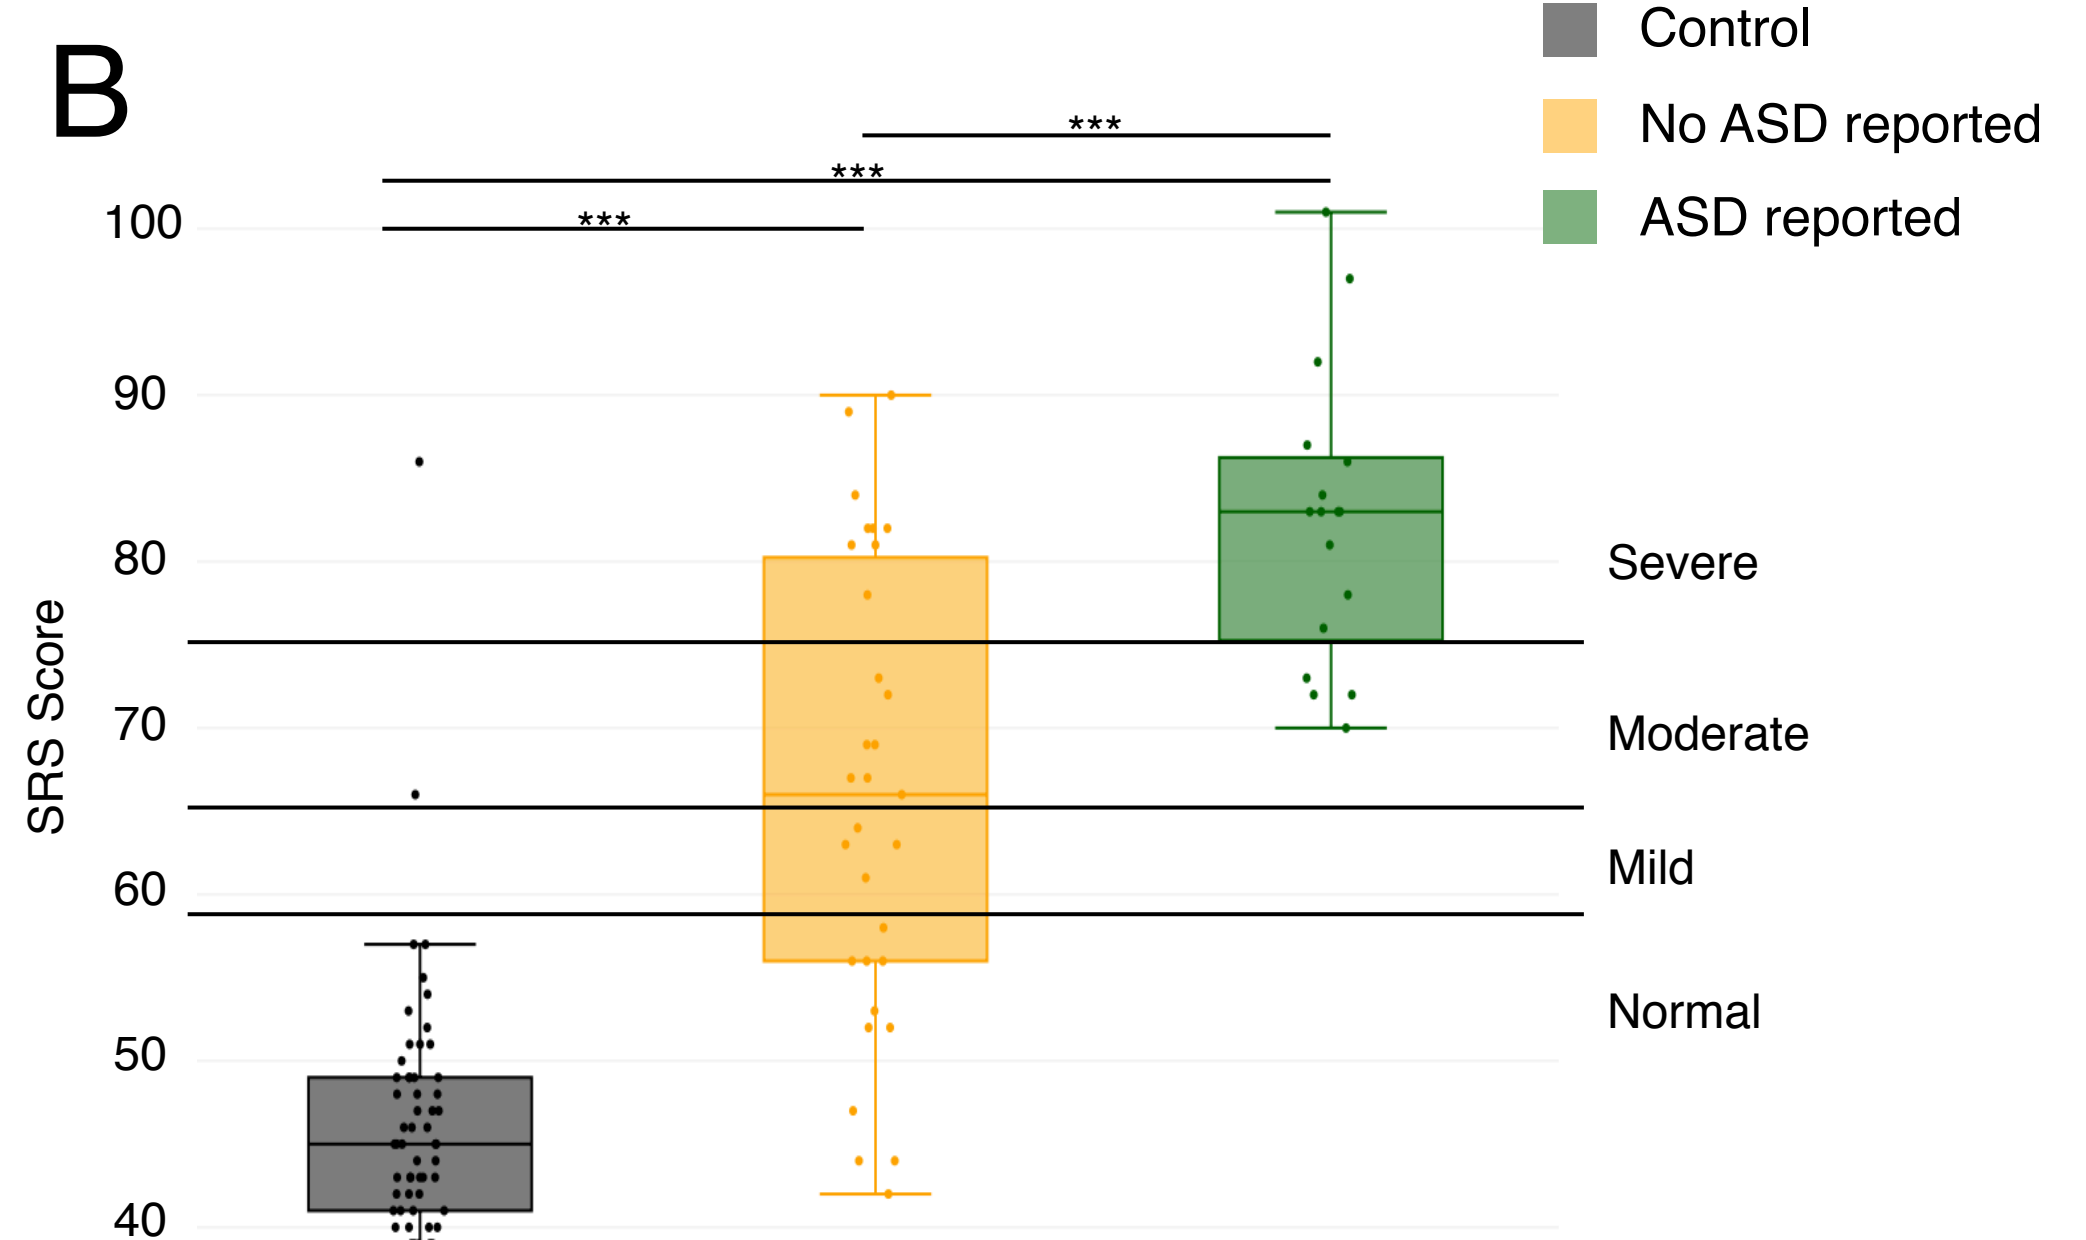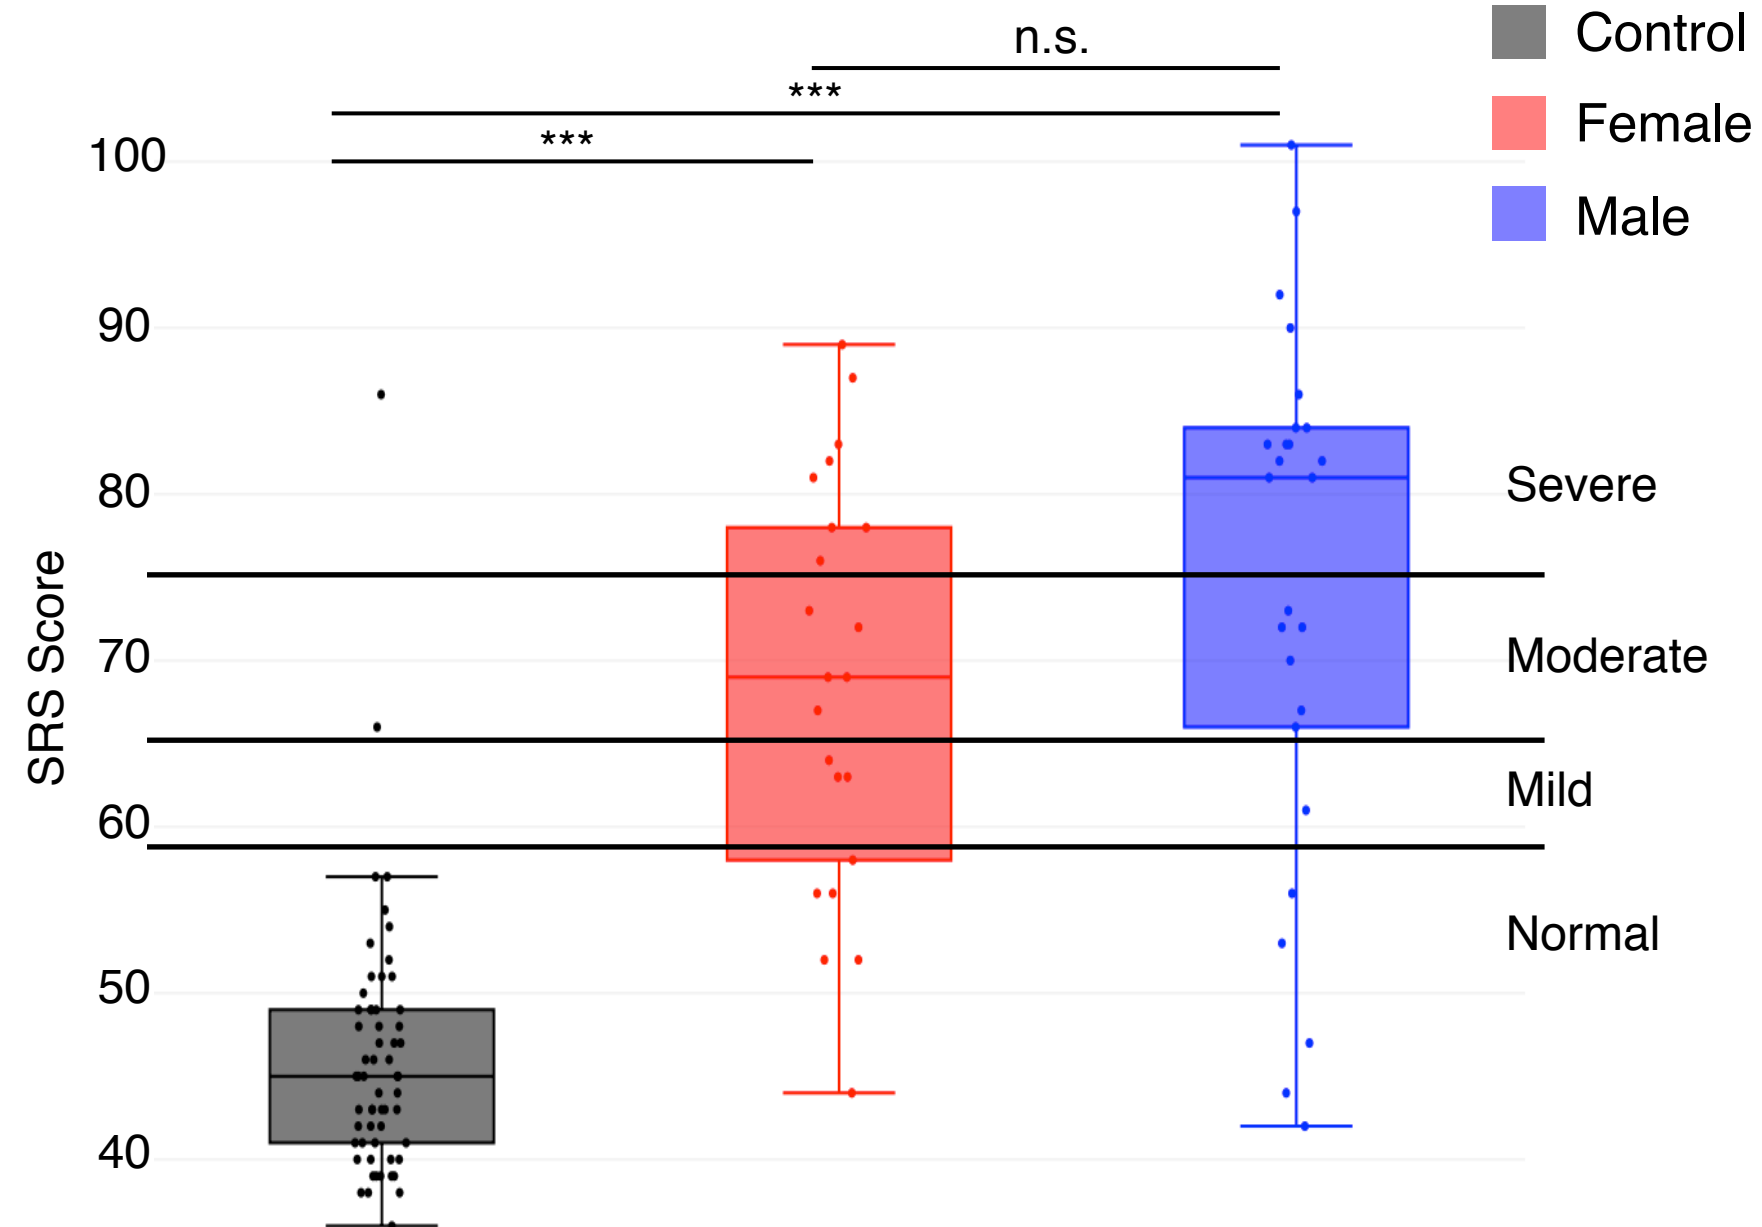**D**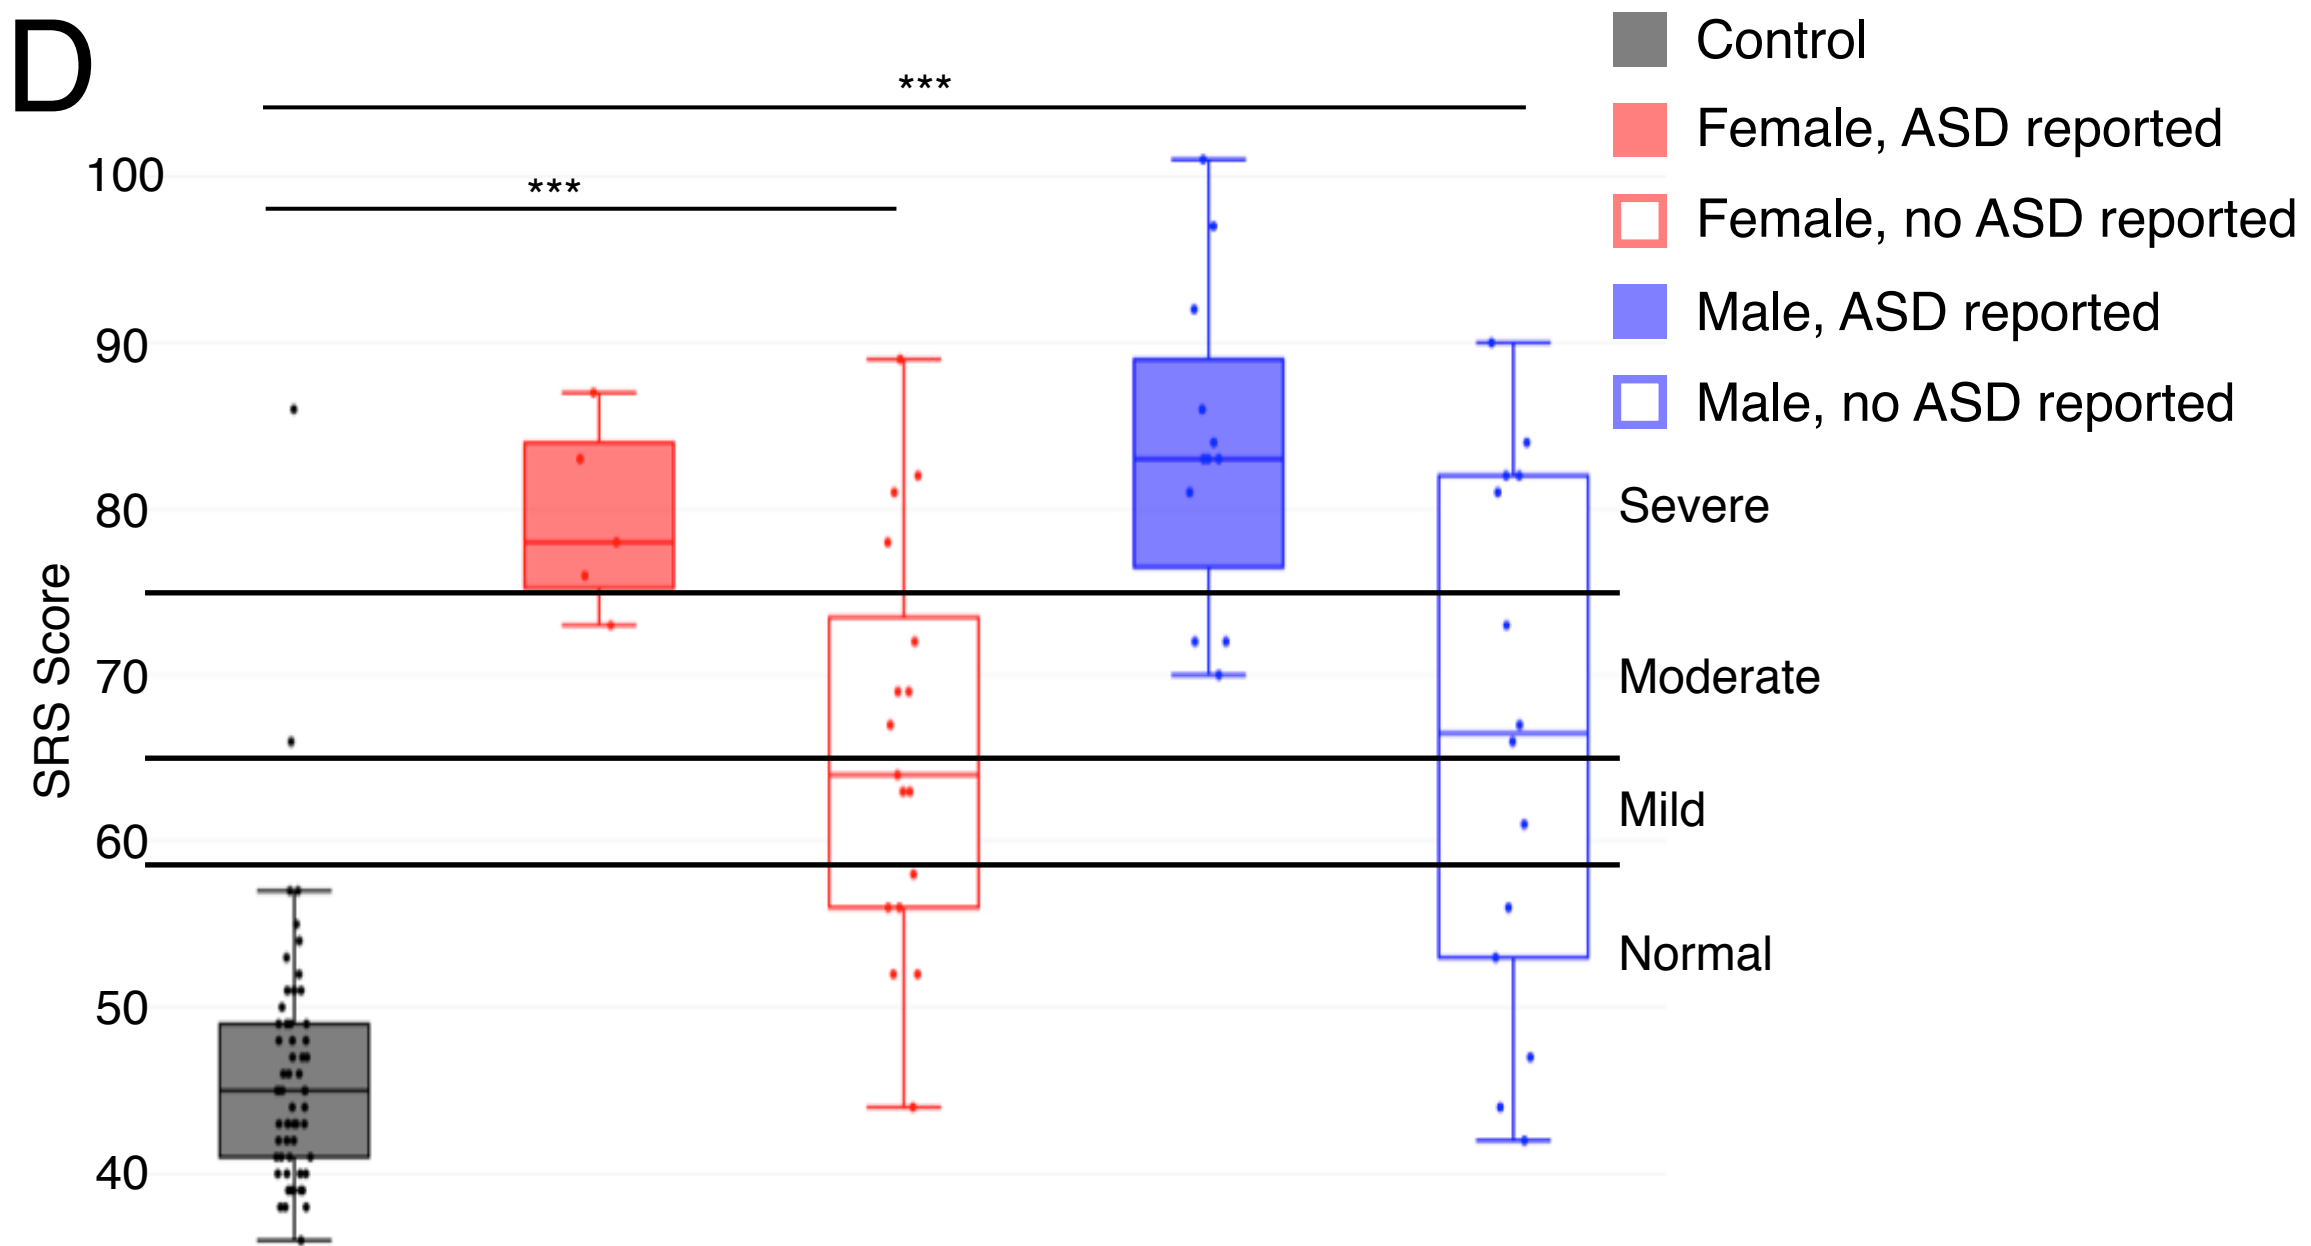



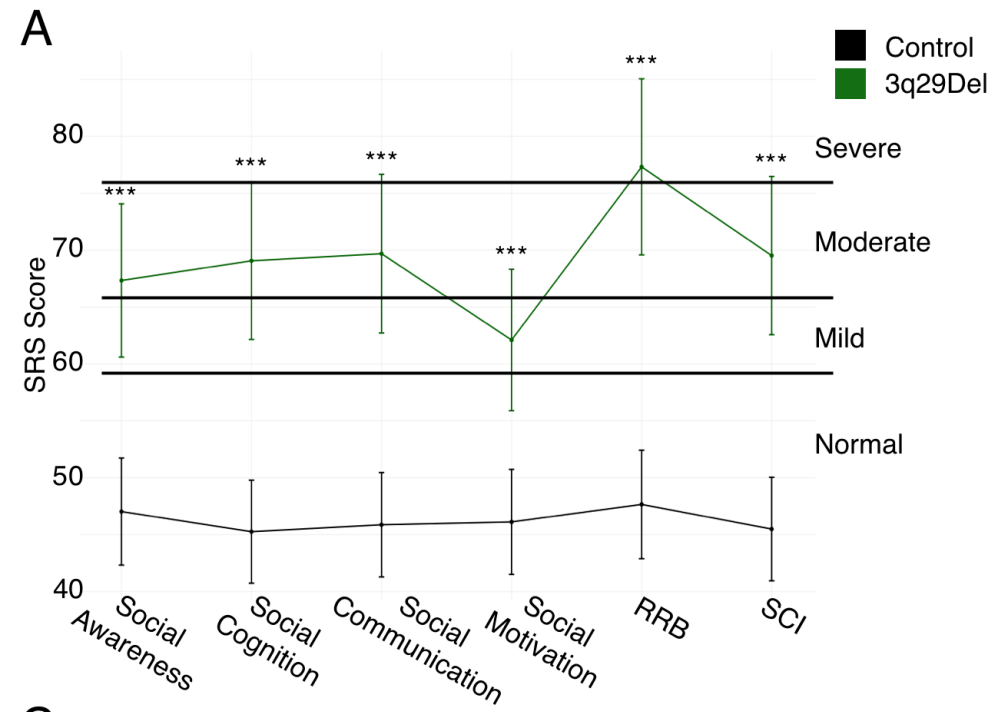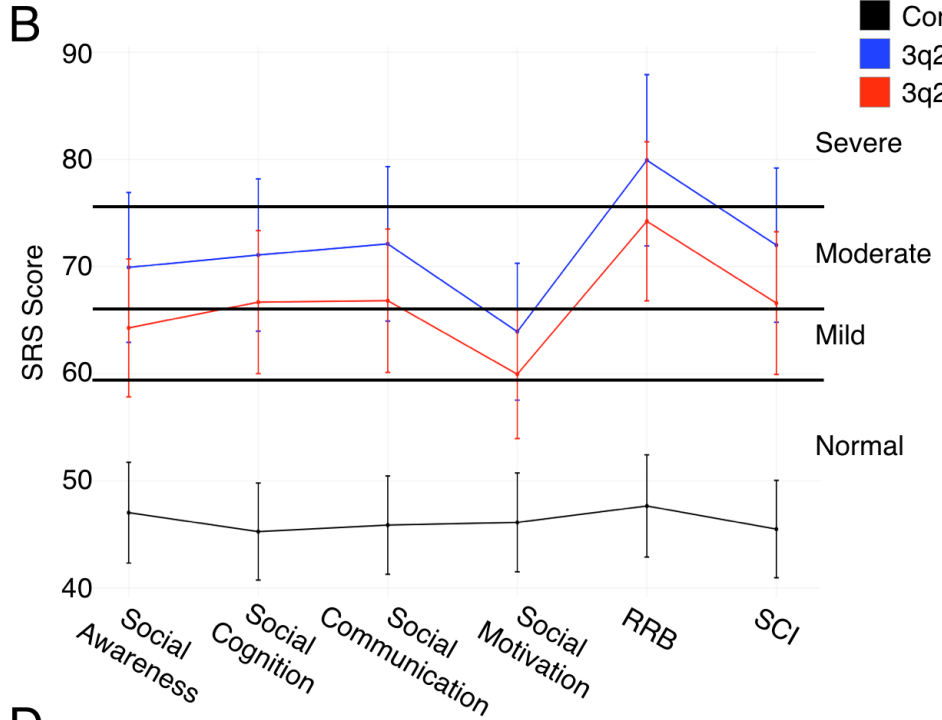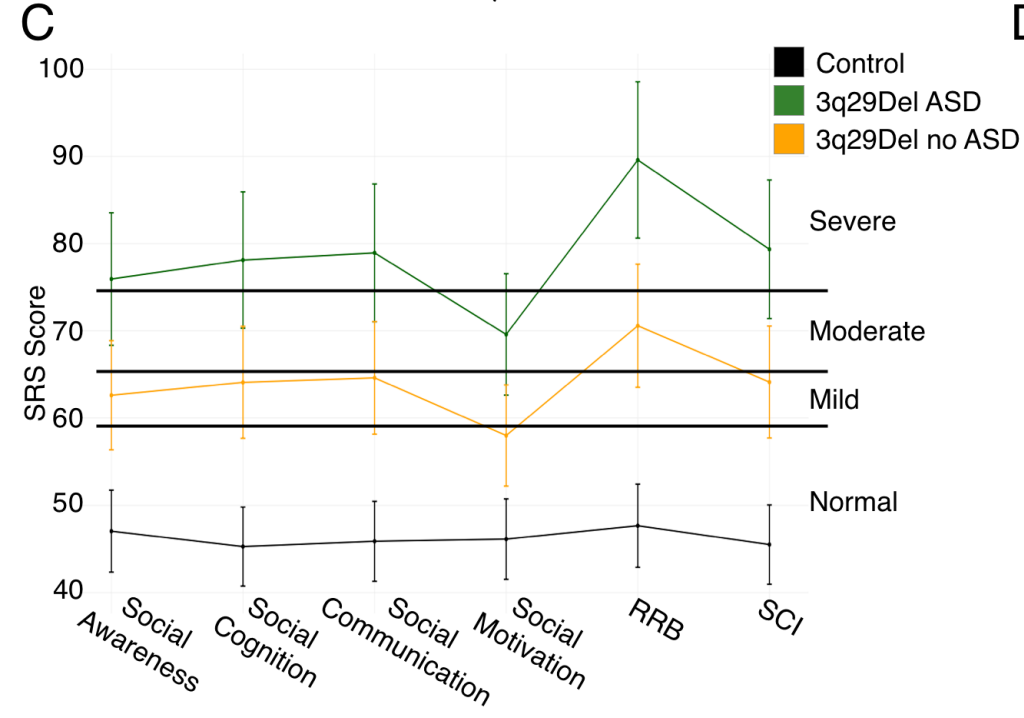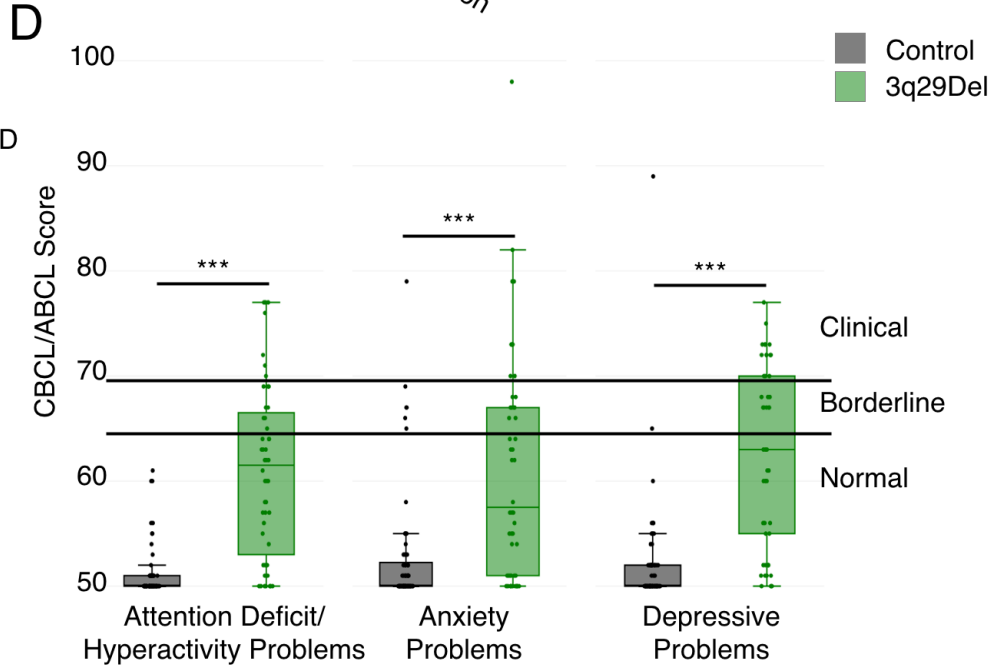

Source: http://biorxiv.org/content/10.1101/386243v5.full.pdf
